# Supplementary material for: Dependency of human and murine LKB1-inactivated lung cancer on aberrant CRTC-CREB activation
Source: PubMed Central journal article supplement (PMC8238510; doi:10.7554/elife.66095), 2021-06-18

# Unedited gels for Figure 1 - figure supplement 3A

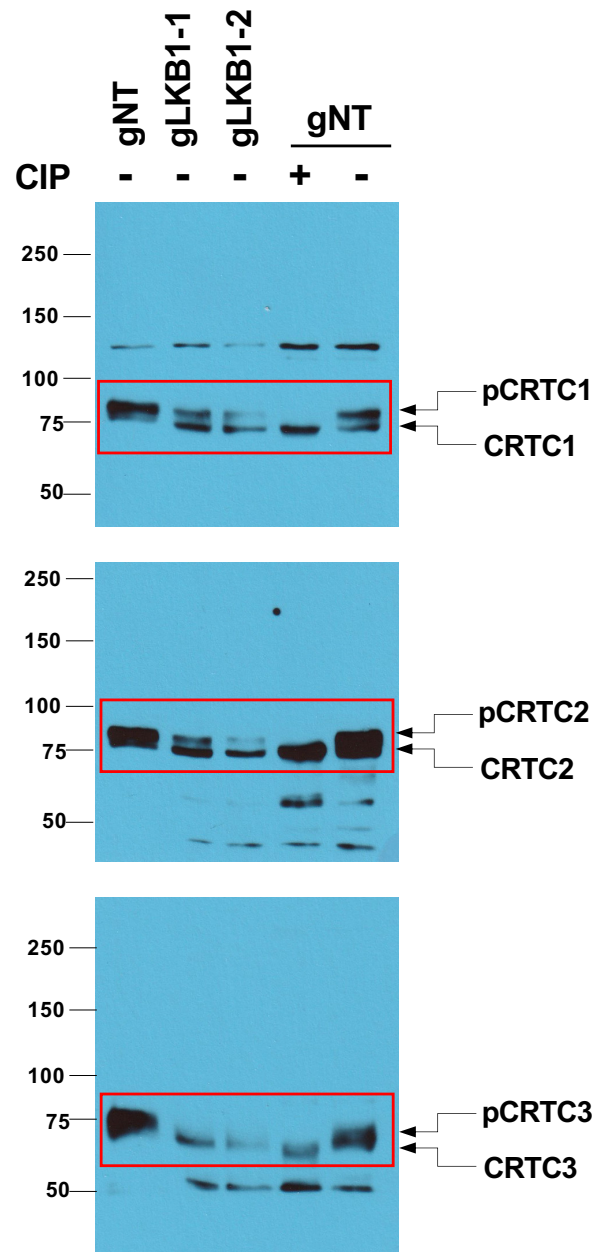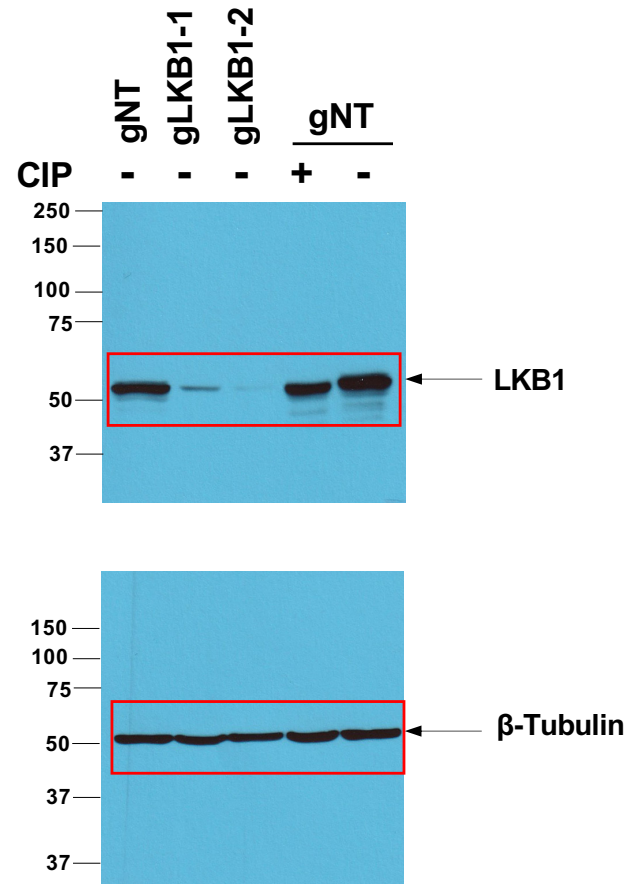

# Unedited gels for Figure 1 - figure supplement 3B

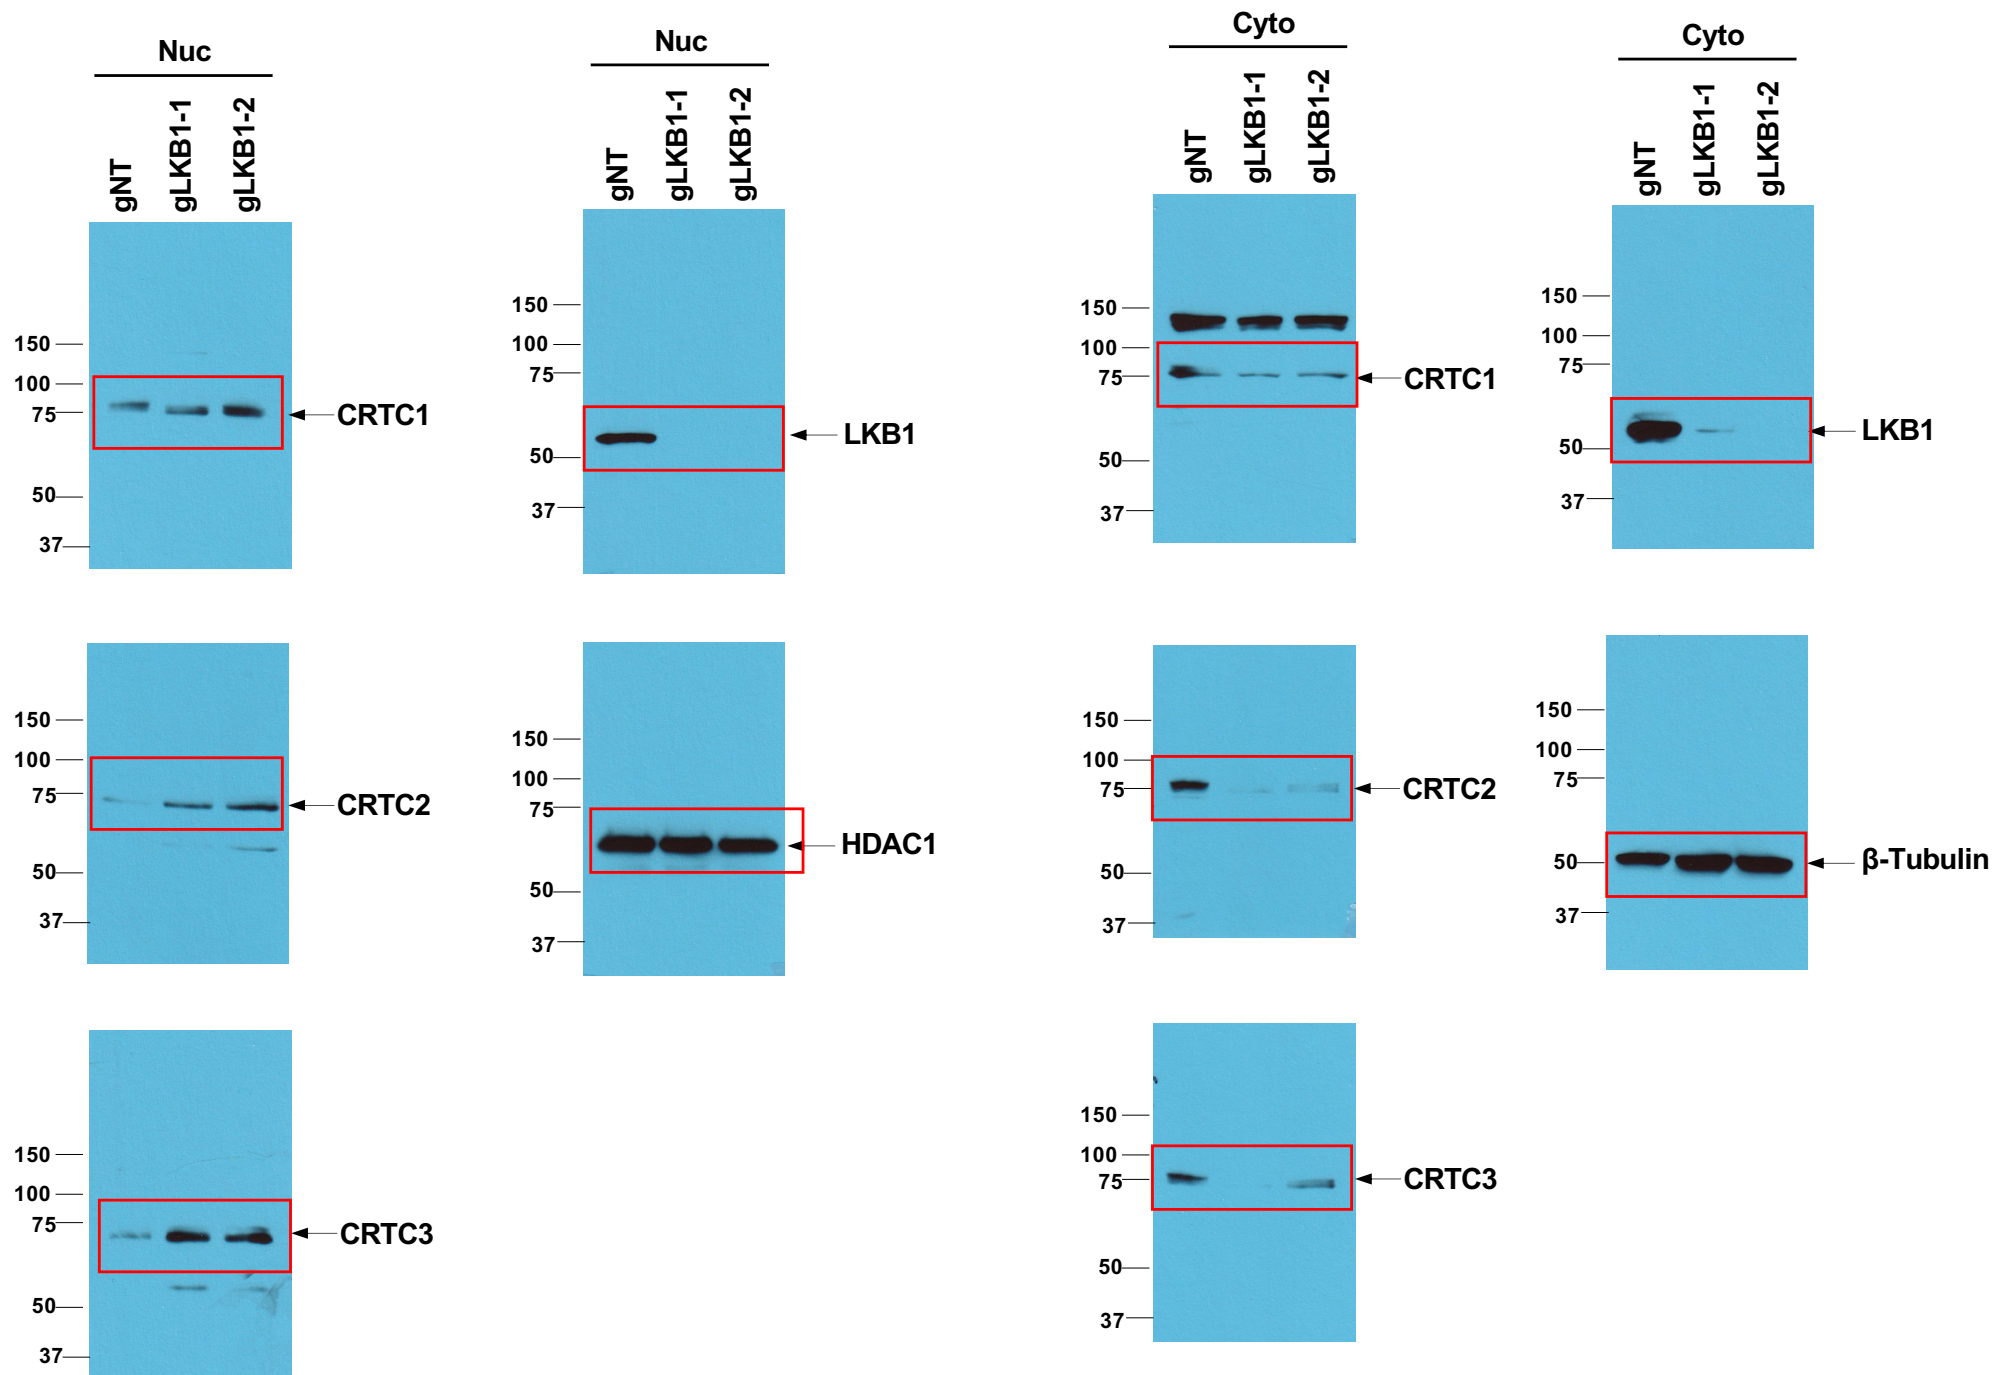

Supplement: elife-66095-fig1-figsupp3-data1.pdf [file elife-66095-fig1-figsupp3-data1.pdf]
