# Supplementary material for: Dependency of human and murine LKB1-inactivated lung cancer on aberrant CRTC-CREB activation
Source: eLife journal article supplement (doi:10.7554/elife.66095), 2021-06-18

# Unedited gel for Figure 5 - figure supplement

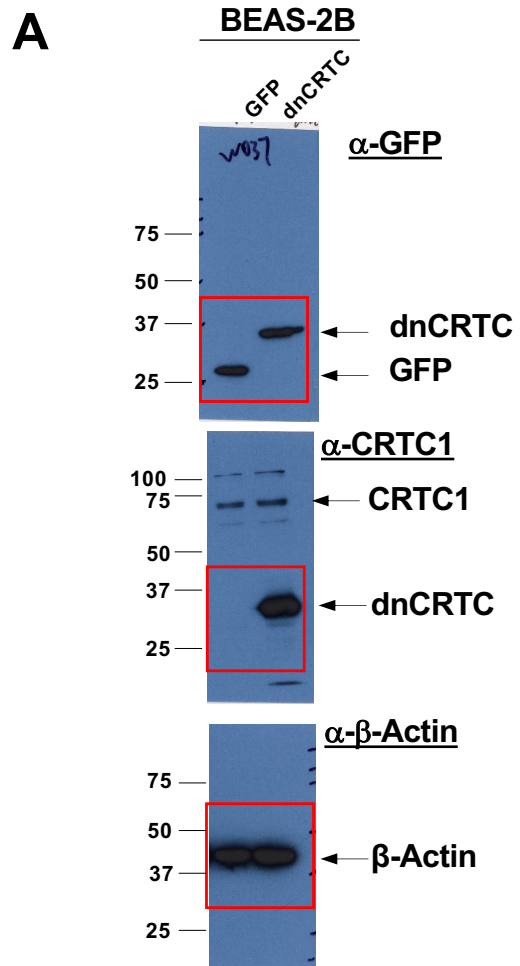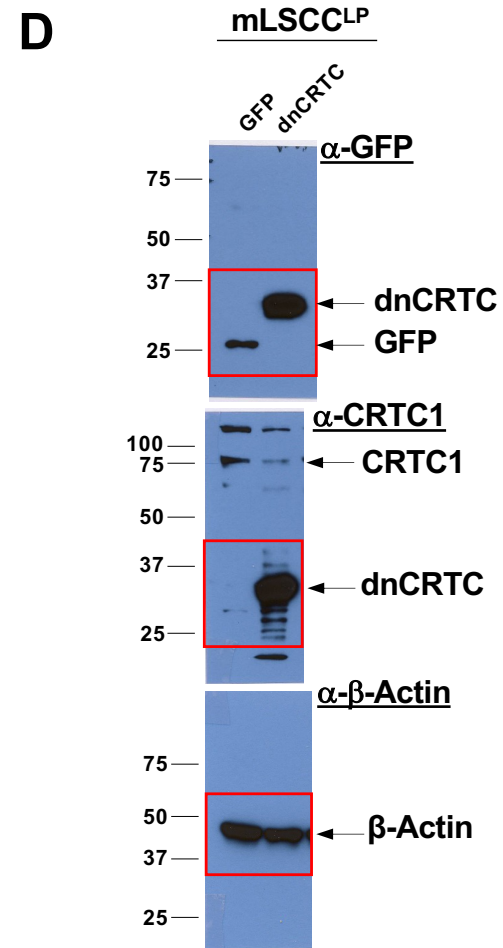

Supplement: fig5-figsupp1-data1 [file elife-66095-fig5-figsupp1-data1-v3.pdf]
