# Supplementary material for: Dependency of human and murine LKB1-inactivated lung cancer on aberrant CRTC-CREB activation
Source: eLife journal article supplement (doi:10.7554/elife.66095), 2021-06-18

# Unedited gel for Figure 6 – figure supplement

**A**

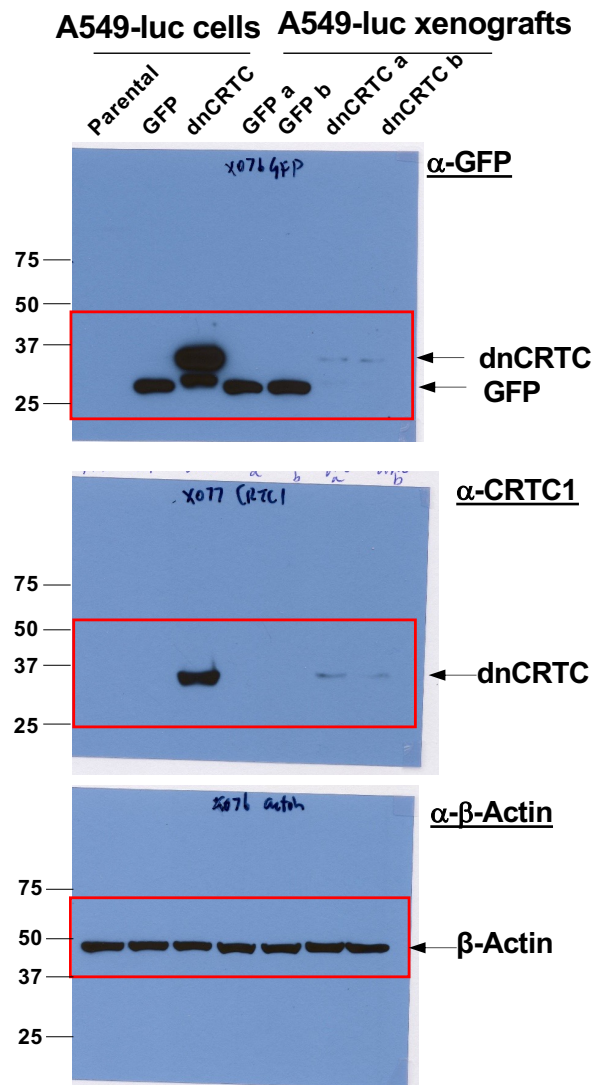

**B**

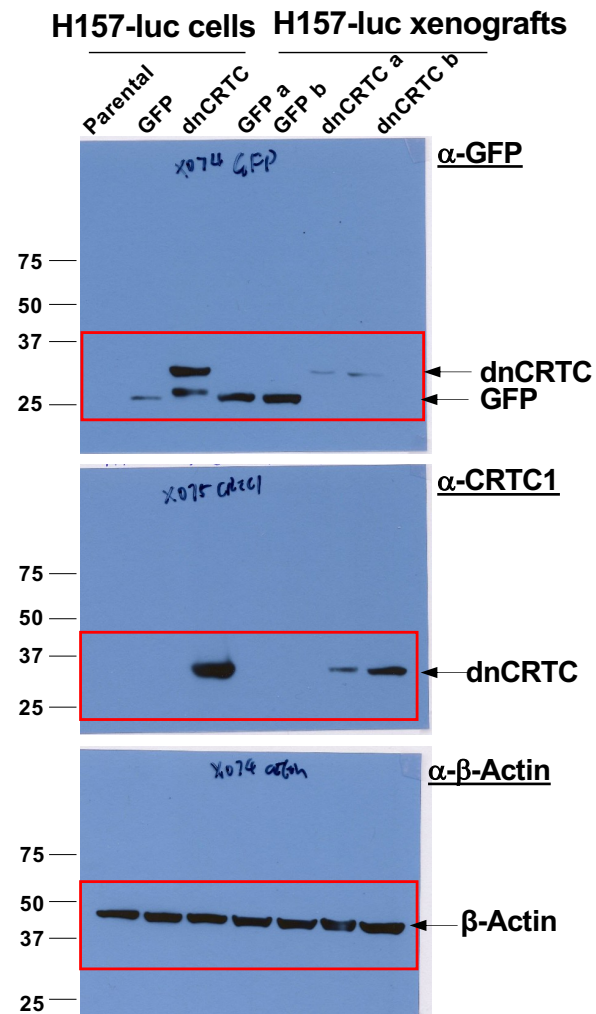

Supplement: fig6-figsupp1-data1 [file elife-66095-fig6-figsupp1-data1-v3.pdf]
