# Supplementary material for: Dependency of human and murine LKB1-inactivated lung cancer on aberrant CRTC-CREB activation
Source: eLife. 2021 Jun 18;10:e66095. doi: 10.7554/eLife.66095 (PMC8238510; doi:10.7554/eLife.66095)
Supplement: Figure 1—source data 1. [file elife-66095-fig1-data1.xlsx]

## Sheet: Figure 1A qPCR
Sample Name	Target Name	Cт value	Cт Mean	dt (Ct (target-GAPDH))	ddt (Normalize to BEAS-2B CRTC1)	Fold change
BEAS-2B	CTRC1	30.4345	29.9601	11.7913	0.474384	0.719774
BEAS-2B	CTRC1	29.4857	29.9601	10.8426	-0.474394	1.38933
A549	CTRC1	29.2535	29.4399	12.3723	1.05533	0.481188
A549	CTRC1	29.6262	29.4399	12.745	1.42802	0.37164
H23	CTRC1	28.5381	28.5595	13.5367	2.2197	0.214685
H23	CTRC1	28.5809	28.5595	13.5794	2.26244	0.208419
H157	CTRC1	28.6677	28.6852	11.9622	0.645281	0.639368
H157	CTRC1	28.7027	28.6852	11.9973	0.680321	0.624027
H460	CTRC1	28.5068	28.6628	11.7374	0.420416	0.747209
H460	CTRC1	28.8189	28.6628	12.0495	0.732509	0.601856
H2122	CTRC1	28.4783	28.4688	11.9894	0.672418	0.627454
H2122	CTRC1	28.4593	28.4688	11.9703	0.653364	0.635796
H2126	CTRC1	28.2219	28.2232	10.3516	-0.965376	1.95257
H2126	CTRC1	28.2245	28.2232	10.3542	-0.962755	1.94903
H322	CTRC1	27.9289	27.9238	10.9278	-0.38917	1.30964
H322	CTRC1	27.9187	27.9238	10.9176	-0.399363	1.31893
H522	CTRC1	27.9045	27.9461	9.50924	-1.80771	3.50086
H522	CTRC1	27.9878	27.9461	9.59252	-1.72443	3.3045
H1819	CTRC1	28.2941	28.4144	11.2372	-0.0797464	1.05683
H1819	CTRC1	28.5347	28.4144	11.4778	0.160827	0.894512
H2087	CTRC1	28.0853	27.8964	11.5259	0.208982	0.865147
H2087	CTRC1	27.7074	27.8964	11.1481	-0.168892	1.12419
H2009	CTRC1	29.1496	29.1847	11.7941	0.4771	0.71842
H2009	CTRC1	29.2198	29.1847	11.8642	0.547272	0.684313
H3123	CTRC1	27.8243	27.9601	11.728	0.411066	0.752068
H3123	CTRC1	28.0959	27.9601	11.9996	0.682621	0.623032
H358	CTRC1	28.4398	28.2127	11.7734	0.456484	0.72876
H358	CTRC1	27.9855	28.2127	11.3192	0.00222381	0.99846
BEAS-2B	CRTC2	25.025	24.904	6.38186	-4.93509	30.5921
BEAS-2B	CRTC2	24.783	24.904	6.13988	-5.17707	36.1787
A549	CRTC2	24.9064	24.9444	8.02519	-3.29176	9.79305
A549	CRTC2	24.9824	24.9444	8.10118	-3.21577	9.29059
H23	CRTC2	22.772	22.755	7.7705	-3.54645	11.6839
H23	CRTC2	22.7381	22.755	7.73663	-3.58032	11.9614
H157	CRTC2	25.7467	25.7436	9.0413	-2.27565	4.84217
H157	CRTC2	25.7405	25.7436	9.03503	-2.28192	4.86326
H460	CRTC2	24.9187	25.0666	8.14929	-3.16766	8.98587
H460	CRTC2	25.2146	25.0666	8.44515	-2.8718	7.31976
H2122	CRTC2	24.1594	23.9822	7.67044	-3.64651	12.523
H2122	CRTC2	23.805	23.9822	7.31602	-4.00093	16.0103
H2126	CRTC2	23.9208	23.8758	6.05045	-5.2665	38.4925
H2126	CRTC2	23.8308	23.8758	5.96053	-5.35642	40.9679
H322	CRTC2	24.9742	24.971	7.9731	-3.34385	10.1531
H322	CRTC2	24.9679	24.971	7.96676	-3.35019	10.1979
H522	CRTC2	24.3469	24.273	5.95161	-5.36534	41.222
H522	CRTC2	24.1991	24.273	5.80379	-5.51316	45.6694
H1819	CRTC2	23.9929	24.023	6.93598	-4.38097	20.8355
H1819	CRTC2	24.0532	24.023	6.99629	-4.32066	19.9824
H2087	CRTC2	23.706	23.7236	7.14663	-4.17032	18.0049
H2087	CRTC2	23.7412	23.7236	7.18177	-4.13518	17.5717
H2009	CRTC2	23.6611	23.6548	6.30548	-5.01147	32.2555
H2009	CRTC2	23.6485	23.6548	6.29294	-5.02401	32.5369
H3123	CRTC2	23.4952	23.4762	7.39889	-3.91806	15.1166
H3123	CRTC2	23.4571	23.4762	7.36084	-3.95611	15.5206
H358	CRTC2	24.4607	24.463	7.79429	-3.52266	11.4928
H358	CRTC2	24.4654	24.463	7.79898	-3.51797	11.4555
BEAS-2B	CRTC3	27.6447	27.486	9.00153	-2.31542	4.9775
BEAS-2B	CRTC3	27.3274	27.486	8.68421	-2.63274	6.20204
A549	CRTC3	24.1299	24.111	7.24865	-4.0683	16.7756
A549	CRTC3	24.0921	24.111	7.2109	-4.10605	17.2204
H23	CRTC3	24.8873	24.8311	9.88587	-1.43108	2.69649
H23	CRTC3	24.7748	24.8311	9.77335	-1.5436	2.9152
H157	CRTC3	25.7613	25.6723	9.05591	-2.26104	4.79336
H157	CRTC3	25.5833	25.6723	8.87784	-2.43911	5.42308
H460	CRTC3	22.5515	22.5759	5.78212	-5.53483	46.3606
H460	CRTC3	22.6002	22.5759	5.83083	-5.48612	44.8217
H2122	CRTC3	25.1201	25.0686	8.63112	-2.68583	6.43452
H2122	CRTC3	25.0172	25.0686	8.52824	-2.78871	6.91011
H2126	CRTC3	23.7976	23.7788	5.9273	-5.38965	41.9223
H2126	CRTC3	23.7599	23.7788	5.88961	-5.42734	43.0321
H322	CRTC3	25.9646	25.9019	8.96348	-2.35347	5.11051
H322	CRTC3	25.8393	25.9019	8.83815	-2.4788	5.57435
H522	CRTC3	24.8773	25.0368	6.48209	-4.83486	28.5389
H522	CRTC3	25.1963	25.0368	6.801	-4.51595	22.879
H1819	CRTC3	24.7175	24.7528	7.66065	-3.6563	12.6083
H1819	CRTC3	24.7881	24.7528	7.73126	-3.58569	12.006
H2087	CRTC3	24.755	24.7613	8.19563	-3.12132	8.70185
H2087	CRTC3	24.7677	24.7613	8.20829	-3.10866	8.6258
H2009	CRTC3	25.4713	25.4728	8.11575	-3.2012	9.19724
H2009	CRTC3	25.4742	25.4728	8.11863	-3.19832	9.17888
H3123	CRTC3	25.1146	25.1493	9.01831	-2.29864	4.91993
H3123	CRTC3	25.1839	25.1493	9.08762	-2.22933	4.68917
H358	CRTC3	23.0472	23.146	6.38078	-4.93617	30.615
H358	CRTC3	23.2448	23.146	6.57843	-4.73852	26.6954
BEAS-2B	GAPDH	18.4336	18.6432
BEAS-2B	GAPDH	18.8528	18.6432
A549	GAPDH	16.884	16.8812
A549	GAPDH	16.8785	16.8812
H23	GAPDH	14.6987	15.0015
H23	GAPDH	15.3042	15.0015
H157	GAPDH	16.6329	16.7054
H157	GAPDH	16.778	16.7054
H460	GAPDH	16.9296	16.7694
H460	GAPDH	16.6092	16.7694
H2122	GAPDH	16.2727	16.489
H2122	GAPDH	16.7052	16.489
H2126	GAPDH	17.935	17.8703
H2126	GAPDH	17.8056	17.8703
H322	GAPDH	17.0579	17.0011
H322	GAPDH	16.9443	17.0011
H522	GAPDH	18.407	18.3953
H522	GAPDH	18.3835	18.3953
H1819	GAPDH	16.9534	17.0569
H1819	GAPDH	17.1603	17.0569
H2087	GAPDH	16.6178	16.5594
H2087	GAPDH	16.501	16.5594
H2009	GAPDH	17.3618	17.3556
H2009	GAPDH	17.3493	17.3556
H3123	GAPDH	16.1173	16.0963
H3123	GAPDH	16.0753	16.0963
H358	GAPDH	16.608	16.6664
H358	GAPDH	16.7248	16.6664
