# Supplementary material for: Dependency of human and murine LKB1-inactivated lung cancer on aberrant CRTC-CREB activation
Source: eLife. 2021 Jun 18;10:e66095. doi: 10.7554/eLife.66095 (PMC8238510; doi:10.7554/eLife.66095)
Supplement: Figure 2—source data 2. [file elife-66095-fig2-data2.xlsx]

## Sheet: Figure 2B qPCR
Sample Name	Target Name	Cт value	Cт Mean	dt (Ct (target-GAPDH))	ddt (Normalize to H522 PA)	Fold change
H522 PA	INSL4	31.3448	31.2385	14.3869	0.101401	0.932127
H522 PA	INSL4	31.1385	31.2385	14.1806	-0.104921	1.07544
A549 PA	INSL4	21.3836	21.3892	4.26449	-10.021	1039.02
A549 PA	INSL4	21.3947	21.3892	4.27553	-10.01	1031.1
A549 sgCtr	INSL4	21.2534	21.2058	4.26464	-10.0209	1038.92
A549 sgCtr	INSL4	21.1583	21.2058	4.16959	-10.1159	1109.66
A549 CRTC1 KO	INSL4	24.9088	24.8955	8.07749	-6.20801	73.926
A549 CRTC1 KO	INSL4	24.8822	24.8955	8.0509	-6.2346	75.3014
A549 CRTC2 KO	INSL4	24.6894	24.687	7.74365	-6.54185	93.1736
A549 CRTC2 KO	INSL4	24.6845	24.687	7.73871	-6.54679	93.493
A549 CRTC3 KO	INSL4	26.8171	26.8586	9.9868	-4.2987	19.6806
A549 CRTC3 KO	INSL4	26.9001	26.8586	10.0698	-4.2157	18.5803
H522 PA	LINC00473	36.0075	36.1007	19.0495	-0.0932657	1.06678
H522 PA	LINC00473	36.194	36.1007	19.2361	0.0932692	0.937396
A549 PA	LINC00473	25.4781	25.5122	8.35892	-10.7839	1763.07
A549 PA	LINC00473	25.5463	25.5122	8.42715	-10.7156	1681.63
A549 sgCtr	LINC00473	25.0752	25.0253	8.08651	-11.0563	2129.47
A549 sgCtr	LINC00473	24.9754	25.0253	7.98664	-11.1561	2282.1
A549 CRTC1 KO	LINC00473	25.4237	25.3876	8.59233	-10.5505	1499.7
A549 CRTC1 KO	LINC00473	25.3516	25.3876	8.5203	-10.6225	1576.48
A549 CRTC2 KO	LINC00473	33.8862	33.423	16.9404	-2.2024	4.60246
A549 CRTC2 KO	LINC00473	32.9598	33.423	16.0141	-3.12872	8.74661
A549 CRTC3 KO	LINC00473	33.8667	33.3918	17.0365	-2.10632	4.30591
A549 CRTC3 KO	LINC00473	32.9168	33.3918	16.0865	-3.0563	8.31836
H522 PA	NR4A2	30.791	30.9567	13.833	-0.165781	1.12177
H522 PA	NR4A2	31.1225	30.9567	14.1646	0.165785	0.891443
A549 PA	NR4A2	26.1082	26.0347	8.98909	-5.00971	32.2162
A549 PA	NR4A2	25.9611	26.0347	8.842	-5.1568	35.674
A549 sgCtr	NR4A2	25.7414	25.802	8.75273	-5.24607	37.951
A549 sgCtr	NR4A2	25.8625	25.802	8.87383	-5.12497	34.8955
A549 CRTC1 KO	NR4A2	28.2505	28.1737	11.4192	-2.57962	5.97781
A549 CRTC1 KO	NR4A2	28.0969	28.1737	11.2656	-2.73319	6.64924
A549 CRTC2 KO	NR4A2	29.3017	29.1938	12.3559	-1.64288	3.12289
A549 CRTC2 KO	NR4A2	29.0858	29.1938	12.1401	-1.85874	3.6269
A549 CRTC3 KO	NR4A2	28.1825	28.1835	11.3522	-2.64659	6.26185
A549 CRTC3 KO	NR4A2	28.1846	28.1835	11.3543	-2.64448	6.25269
H522 PA	GAPDH	16.9354	16.9579
H522 PA	GAPDH	16.9804	16.9579
A549 PA	GAPDH	17.2067	17.1191
A549 PA	GAPDH	17.0316	17.1191
A549 sgCtr	GAPDH	16.9449	16.9887
A549 sgCtr	GAPDH	17.0326	16.9887
A549 CRTC1 KO	GAPDH	16.7171	16.8313
A549 CRTC1 KO	GAPDH	16.9455	16.8313
A549 CRTC2 KO	GAPDH	16.97	16.9458
A549 CRTC2 KO	GAPDH	16.9215	16.9458
A549 CRTC3 KO	GAPDH	16.7827	16.8303
A549 CRTC3 KO	GAPDH	16.8779	16.8303

## Sheet: Figure 2C cell proliferation
	cell numbers (n * 10^6)
	samples	1st replicate	2nd replicate	3rd replicate
	A549 sgCtr	1.65	1.55	1.52
	A549 CRTC1 KO	1.35	1.3	1.32
	A549 CRTC2 KO	1.05	1.15	1.31
	A549 CRTC3 KO	1.25	1.1	1.37

## Sheet: Figure 2D apoptosis assay
	percentage of apoptotic cells (%)
	samples	1st replicate	2nd replicate	3rd replicate
	A549 sgCtr	4.9	5.4	6.3
	A549 CRTC1 KO	6.8	6.5	7.2
	A549 CRTC2 KO	7.8	8.1	7.4
	A549 CRTC3 KO	7.2	8.1	7.8

## Sheet: Figure 2E soft agar assay
	Number of colonies (per imaging field)
	samples	1st replicate	2nd replicate	3rd replicate
	A549 sgCtr	203	182	207
	A549 CRTC1 KO	153	150	144
	A549 CRTC2 KO	175	161	171
	A549 CRTC3 KO	184	149	180
