# Supplementary material for: Dependency of human and murine LKB1-inactivated lung cancer on aberrant CRTC-CREB activation
Source: eLife. 2021 Jun 18;10:e66095. doi: 10.7554/eLife.66095 (PMC8238510; doi:10.7554/eLife.66095)
Supplement: Figure 3—source data 2. [file elife-66095-fig3-data2.xlsx]

## Sheet: Figure 3D report assay
	Fold activation (Normalized to GFP-vector)
	samples	GFP		dnCRTC
		1st replicate	2nd replicate	1st replicate	2nd replicate
	vector	0.970691	1.00333	0.482379	0.427164
	CRTC1	15.1683	14.5529	6.01661	6.48482
	CRTC2	5.32034	8.01706	3.19037	3.39535
	CRTC3	9.68503	9.80248	2.48571	2.50606

## Sheet: Figure 3F qPCR
Fold change (Normalize to Beads-GFP sample)
	Beads				GFPTrap
	GFP		dnCRTC		GFP		dnCRTC
	1st replicate	2nd replicate	1st replicate	2nd replicate	1st replicate	2nd replicate	1st replicate	2nd replicate
LINC00473 Pro	0.999819	0.6133	0.480957	0.504488	8.31368	8.50528	223.825	214.168
NR4A2 Pro	1.00003	2.69466	4.32534	1.80831	21.6506	20.7334	755.065	612.245

## Sheet: Figure 3G ChIP qPCR
Sample Name	Target Name	Cт value	Cт Mean	dt (Normalize to A549-GFP-ChIP-IgG sample)	Fold change
A549 GFP ChIP IgG	NR4A2 Pro	32.0956	31.743	0.3526	0.783171
A549 GFP ChIP IgG	NR4A2 Pro	31.4721	31.743	-0.270874	1.20654
A549 GFP ChIP IgG	NR4A2 Pro	31.6614	31.743	-0.0815868	1.05818
A549 GFP ChIP CRTC1	NR4A2 Pro	30.711	30.6593	-1.03197	2.04481
A549 GFP ChIP CRTC1	NR4A2 Pro	30.4136	30.6593	-1.32936	2.51291
A549 GFP ChIP CRTC1	NR4A2 Pro	30.8531	30.6593	-0.889912	1.85306
A549 GFP ChIP CRTC2	NR4A2 Pro	29.9807	29.4975	-1.76233	3.39244
A549 GFP ChIP CRTC2	NR4A2 Pro	29.2193	29.4975	-2.52374	5.75069
A549 GFP ChIP CRTC2	NR4A2 Pro	29.2926	29.4975	-2.45036	5.46551
A549 GFP ChIP CRTC3	NR4A2 Pro	27.7018	27.9058	-4.04125	16.464
A549 GFP ChIP CRTC3	NR4A2 Pro	28.0389	27.9058	-3.70412	13.0332
A549 GFP ChIP CRTC3	NR4A2 Pro	27.9769	27.9058	-3.76611	13.6054
A549 dnCRTC ChIP IgG	NR4A2 Pro	31.8372	32.5787	0.0941735	0.936809
A549 dnCRTC ChIP IgG	NR4A2 Pro	33.8891	32.5787	2.14615	0.225915
A549 dnCRTC ChIP IgG	NR4A2 Pro	32.0098	32.5787	0.266785	0.83117
A549 dnCRTC ChIP CRTC1	NR4A2 Pro	31.5667	31.6079	-0.1763	1.12998
A549 dnCRTC ChIP CRTC1	NR4A2 Pro	31.5471	31.6079	-0.195858	1.14541
A549 dnCRTC ChIP CRTC1	NR4A2 Pro	31.71	31.6079	-0.033024	1.02521
A549 dnCRTC ChIP CRTC2	NR4A2 Pro	30.6667	31.2944	-1.07629	2.1086
A549 dnCRTC ChIP CRTC2	NR4A2 Pro	30.6622	31.2944	-1.08075	2.11514
A549 dnCRTC ChIP CRTC2	NR4A2 Pro	32.5542	31.2944	0.811153	0.569926
A549 dnCRTC ChIP CRTC3	NR4A2 Pro	29.2454	29.7289	-2.49763	5.64755
A549 dnCRTC ChIP CRTC3	NR4A2 Pro	30.372	29.7289	-1.37101	2.58651
A549 dnCRTC ChIP CRTC3	NR4A2 Pro	29.5693	29.7289	-2.17375	4.51193
A549 GFP ChIP IgG	Lnc473 Pro	34.9485	34.7741	0.174452	0.886104
A549 GFP ChIP IgG	Lnc473 Pro	34.3805	34.7741	-0.39348	1.31356
A549 GFP ChIP IgG	Lnc473 Pro	34.9934	34.7741	0.219362	0.858945
A549 GFP ChIP CRTC1	Lnc473 Pro	29.6592	29.6723	-5.11479	34.6555
A549 GFP ChIP CRTC1	Lnc473 Pro	29.7726	29.6723	-5.00142	32.0392
A549 GFP ChIP CRTC1	Lnc473 Pro	29.5852	29.6723	-5.18882	36.4892
A549 GFP ChIP CRTC2	Lnc473 Pro	29.8697	30.1508	-4.90425	29.9452
A549 GFP ChIP CRTC2	Lnc473 Pro	30.1553	30.1508	-4.61866	24.5671
A549 GFP ChIP CRTC2	Lnc473 Pro	30.4272	30.1508	-4.3468	20.3478
A549 GFP ChIP CRTC3	Lnc473 Pro	29.2299	29.1361	-5.54408	46.659
A549 GFP ChIP CRTC3	Lnc473 Pro	29.2105	29.1361	-5.56346	47.2901
A549 GFP ChIP CRTC3	Lnc473 Pro	28.9678	29.1361	-5.80615	55.9533
A549 dnCRTC ChIP IgG	Lnc473 Pro	35.6785	35.7617	0.9045	0.534218
A549 dnCRTC ChIP IgG	Lnc473 Pro	35.797	35.7617	1.02299	0.492094
A549 dnCRTC ChIP IgG	Lnc473 Pro	35.8097	35.7617	1.03572	0.487771
A549 dnCRTC ChIP CRTC1	Lnc473 Pro	30.6129	30.6154	-4.16107	17.8613
A549 dnCRTC ChIP CRTC1	Lnc473 Pro	30.5707	30.6154	-4.20327	18.3105
A549 dnCRTC ChIP CRTC1	Lnc473 Pro	30.6624	30.6154	-4.11159	17.2999
A549 dnCRTC ChIP CRTC2	Lnc473 Pro	34.8206	33.9541	0.0465643	0.968239
A549 dnCRTC ChIP CRTC2	Lnc473 Pro	33.2478	33.9541	-1.52618	2.88023
A549 dnCRTC ChIP CRTC2	Lnc473 Pro	33.7939	33.9541	-0.980074	1.97257
A549 dnCRTC ChIP CRTC3	Lnc473 Pro	33.3567	33.0839	-1.41727	2.6708
A549 dnCRTC ChIP CRTC3	Lnc473 Pro	32.9766	33.0839	-1.7974	3.47593
A549 dnCRTC ChIP CRTC3	Lnc473 Pro	32.9184	33.0839	-1.85558	3.61898
A549 GFP ChIP IgG	GAPDH Pro	32.6005	32.6957	-0.0944789	1.06768
A549 GFP ChIP IgG	GAPDH Pro	32.6285	32.6957	-0.0665134	1.04718
A549 GFP ChIP IgG	GAPDH Pro	32.8581	32.6957	0.163128	0.893087
A549 GFP ChIP CRTC1	GAPDH Pro	32.6138	32.6057	-0.0812457	1.05793
A549 GFP ChIP CRTC1	GAPDH Pro	32.5619	32.6057	-0.133124	1.09667
A549 GFP ChIP CRTC1	GAPDH Pro	32.6415	32.6057	-0.0535205	1.03779
A549 GFP ChIP CRTC2	GAPDH Pro	32.7417	32.3178	0.0466954	0.968151
A549 GFP ChIP CRTC2	GAPDH Pro	31.9373	32.3178	-0.757664	1.69075
A549 GFP ChIP CRTC2	GAPDH Pro	32.2743	32.3178	-0.420651	1.33853
A549 GFP ChIP CRTC3	GAPDH Pro	31.2301	31.2551	-1.4649	2.76044
A549 GFP ChIP CRTC3	GAPDH Pro	30.8693	31.2551	-1.82574	3.5449
A549 GFP ChIP CRTC3	GAPDH Pro	31.666	31.2551	-1.02901	2.04062
A549 dnCRTC ChIP IgG	GAPDH Pro	32.3399	32.6612	-0.35513	1.2791
A549 dnCRTC ChIP IgG	GAPDH Pro	32.6875	32.6612	-0.00754	1.00524
A549 dnCRTC ChIP IgG	GAPDH Pro	32.9562	32.6612	0.261184	0.834403
A549 dnCRTC ChIP CRTC1	GAPDH Pro	32.0619	32.2028	-0.633114	1.55091
A549 dnCRTC ChIP CRTC1	GAPDH Pro	32.5587	32.2028	-0.136307	1.09909
A549 dnCRTC ChIP CRTC1	GAPDH Pro	31.9879	32.2028	-0.707114	1.63253
A549 dnCRTC ChIP CRTC2	GAPDH Pro	33.0035	33.1272	0.308502	0.80748
A549 dnCRTC ChIP CRTC2	GAPDH Pro	32.8925	33.1272	0.197456	0.872087
A549 dnCRTC ChIP CRTC2	GAPDH Pro	33.4857	33.1272	0.790748	0.578044
A549 dnCRTC ChIP CRTC3	GAPDH Pro	31.1442	31.6109	-1.5508	2.9298
A549 dnCRTC ChIP CRTC3	GAPDH Pro	31.689	31.6109	-1.00597	2.0083
A549 dnCRTC ChIP CRTC3	GAPDH Pro	31.9995	31.6109	-0.695504	1.61945
