# Supplementary material for: Dependency of human and murine LKB1-inactivated lung cancer on aberrant CRTC-CREB activation
Source: eLife. 2021 Jun 18;10:e66095. doi: 10.7554/eLife.66095 (PMC8238510; doi:10.7554/eLife.66095)
Supplement: Figure 4—figure supplement 1—source data 1. [file elife-66095-fig4-figsupp1-data1.xlsx]

## Sheet: Figure S5 dnCRTC targets qPCR
Sample Name	Target Name	Cт value	Cт Mean	dt (Ct (target-GAPDH))	ddt (Normalize to H322-GFP sample)	Fold change
H322 GFP	INSL4	37.1437	38.5474	20.3291	-1.40365	2.6457
H322 GFP	INSL4	38.4984	38.5474	21.6838	-0.0489741	1.03453
H322 GFP	INSL4	40	38.5474	23.1854	1.45261	0.36536
H322 dnCRTC	INSL4	39.3851	38.7095	22.4224	0.689655	0.620002
H322 dnCRTC	INSL4	40	38.7095	23.0373	1.30459	0.404835
H322 dnCRTC	INSL4	36.7436	38.7095	19.7809	-1.95185	3.86872
H522 GFP	INSL4	37.2728	37.769	19.2806	-2.45217	5.47239
H522 GFP	INSL4	36.0342	37.769	18.0421	-3.69069	12.9125
H522 GFP	INSL4	40	37.769	22.0078	0.275076	0.826407
H522 dnCRTC	INSL4	35.5624	38.5208	17.6451	-4.0877	17.0028
H522 dnCRTC	INSL4	40	38.5208	22.0826	0.349899	0.784639
H522 dnCRTC	INSL4	40	38.5208	22.0826	0.349899	0.784639
A549 GFP	INSL4	19.8637	19.8266	2.83731	-18.8954	487633
A549 GFP	INSL4	19.7146	19.8266	2.68818	-19.0446	540737
A549 GFP	INSL4	19.9014	19.8266	2.87498	-18.8578	475065
A549 dnCRTC	INSL4	26.3379	26.7385	9.46215	-12.2706	4941.03
A549 dnCRTC	INSL4	27.0198	26.7385	10.1441	-11.5887	3079.93
A549 dnCRTC	INSL4	26.8576	26.7385	9.98182	-11.7509	3446.53
H157 GFP	INSL4	32.9942	33.7495	16.1513	-5.58141	47.882
H157 GFP	INSL4	35.5665	33.7495	18.7236	-3.00913	8.0508
H157 GFP	INSL4	32.688	33.7495	15.8451	-5.88761	59.2035
H157 dnCRTC	INSL4	36.9819	35.3399	19.9416	-1.79118	3.46099
H157 dnCRTC	INSL4	33.0855	35.3399	16.0452	-5.68755	51.5373
H157 dnCRTC	INSL4	35.9524	35.3399	18.9121	-2.82067	7.06489
H322 GFP	CPS1	30.9209	31.2603	14.1062	-0.339398	1.26523
H322 GFP	CPS1	30.9853	31.2603	14.1707	-0.274925	1.20993
H322 GFP	CPS1	31.8746	31.2603	15.06	0.614337	0.65323
H322 dnCRTC	CPS1	30.6678	30.3013	13.7052	-0.740442	1.67069
H322 dnCRTC	CPS1	30.548	30.3013	13.5853	-0.860295	1.81541
H322 dnCRTC	CPS1	29.688	30.3013	12.7253	-1.72028	3.29499
H522 GFP	CPS1	31.5512	32.4396	13.5591	-0.886553	1.84875
H522 GFP	CPS1	32.5499	32.4396	14.5577	0.112106	0.925236
H522 GFP	CPS1	33.2178	32.4396	15.2256	0.780006	0.582364
H522 dnCRTC	CPS1	31.6207	32.0295	13.7034	-0.742264	1.6728
H522 dnCRTC	CPS1	33.2188	32.0295	15.3014	0.855829	0.552548
H522 dnCRTC	CPS1	31.2489	32.0295	13.3315	-1.11407	2.16456
A549 GFP	CPS1	22.6462	22.5718	5.61978	-8.82584	453.778
A549 GFP	CPS1	22.559	22.5718	5.53261	-8.91301	482.041
A549 GFP	CPS1	22.5101	22.5718	5.48367	-8.96195	498.674
A549 dnCRTC	CPS1	25.4375	25.7552	8.56174	-5.88388	59.0505
A549 dnCRTC	CPS1	25.9307	25.7552	9.05494	-5.39068	41.9523
A549 dnCRTC	CPS1	25.8975	25.7552	9.02172	-5.4239	42.9297
H157 GFP	CPS1	30.9044	31.0119	14.0615	-0.3841	1.30505
H157 GFP	CPS1	31.2599	31.0119	14.4171	-0.028566	1.02
H157 GFP	CPS1	30.8714	31.0119	14.0286	-0.417016	1.33516
H157 dnCRTC	CPS1	32.9449	32.9975	15.9046	1.45895	0.363757
H157 dnCRTC	CPS1	32.589	32.9975	15.5487	1.10305	0.46553
H157 dnCRTC	CPS1	33.4586	32.9975	16.4184	1.97273	0.25477
H322 GFP	NR4A2	23.4985	23.4461	6.68385	0.0524322	0.964309
H322 GFP	NR4A2	23.4443	23.4461	6.62969	-0.00172502	1.0012
H322 GFP	NR4A2	23.3954	23.4461	6.58071	-0.0507076	1.03577
H322 dnCRTC	NR4A2	25.2985	25.0984	8.33589	1.70447	0.306834
H322 dnCRTC	NR4A2	25.1099	25.0984	8.1472	1.51578	0.349708
H322 dnCRTC	NR4A2	24.8867	25.0984	7.92404	1.29262	0.40821
H522 GFP	NR4A2	26.8252	26.9106	8.83302	2.2016	0.217396
H522 GFP	NR4A2	26.7498	26.9106	8.75767	2.12625	0.229053
H522 GFP	NR4A2	27.1568	26.9106	9.16459	2.53317	0.172759
H522 dnCRTC	NR4A2	26.0789	26.1616	8.16159	1.53018	0.346235
H522 dnCRTC	NR4A2	26.0583	26.1616	8.1409	1.50948	0.351237
H522 dnCRTC	NR4A2	26.3475	26.1616	8.43012	1.7987	0.287433
A549 GFP	NR4A2	22.7204	22.7697	5.69399	-0.937424	1.91511
A549 GFP	NR4A2	22.8842	22.7697	5.85773	-0.773687	1.70963
A549 GFP	NR4A2	22.7044	22.7697	5.678	-0.953416	1.93645
A549 dnCRTC	NR4A2	26.138	26.5111	9.26225	2.63084	0.161451
A549 dnCRTC	NR4A2	26.4111	26.5111	9.53531	2.90389	0.133611
A549 dnCRTC	NR4A2	26.9842	26.5111	10.1084	3.47696	0.0898112
H157 GFP	NR4A2	22.4896	22.6558	5.6468	-0.984624	1.9788
H157 GFP	NR4A2	22.704	22.6558	5.86118	-0.77024	1.70555
H157 GFP	NR4A2	22.7737	22.6558	5.9309	-0.700517	1.62509
H157 dnCRTC	NR4A2	25.8729	25.8142	8.83259	2.20117	0.217462
H157 dnCRTC	NR4A2	25.9789	25.8142	8.93864	2.30723	0.202049
H157 dnCRTC	NR4A2	25.5908	25.8142	8.5505	1.91908	0.264424
H322 GFP	PDK4	32.5744	32.5496	15.7598	0.0248051	0.982953
H322 GFP	PDK4	31.2586	32.5496	14.444	-1.291	2.44698
H322 GFP	PDK4	33.8158	32.5496	17.0012	1.2662	0.415754
H322 dnCRTC	PDK4	33.1078	33.0731	16.1451	0.410188	0.752525
H322 dnCRTC	PDK4	32.1561	33.0731	15.1935	-0.541495	1.45548
H322 dnCRTC	PDK4	33.9554	33.0731	16.9928	1.25783	0.418171
H522 GFP	PDK4	27.5678	27.4509	9.5756	-6.15936	71.4745
H522 GFP	PDK4	27.6588	27.4509	9.66663	-6.06833	67.1043
H522 GFP	PDK4	27.126	27.4509	9.13381	-6.60115	97.0835
H522 dnCRTC	PDK4	27.8086	27.6755	9.89125	-5.84371	57.4291
H522 dnCRTC	PDK4	27.5694	27.6755	9.65205	-6.08291	67.7858
H522 dnCRTC	PDK4	27.6485	27.6755	9.73119	-6.00377	64.1675
A549 GFP	PDK4	20.4199	20.756	3.39351	-12.3414	5189.75
A549 GFP	PDK4	20.9262	20.756	3.89974	-11.8352	3653.88
A549 GFP	PDK4	20.9219	20.756	3.89544	-11.8395	3664.8
A549 dnCRTC	PDK4	23.4993	23.7866	6.62353	-9.11143	553.113
A549 dnCRTC	PDK4	23.929	23.7866	7.05327	-8.68169	410.628
A549 dnCRTC	PDK4	23.9314	23.7866	7.05566	-8.6793	409.95
H157 GFP	PDK4	35.951	34.445	19.1082	3.37321	0.0965079
H157 GFP	PDK4	32.2259	34.445	15.3831	-0.351856	1.2762
H157 GFP	PDK4	35.1581	34.445	18.3153	2.58034	0.167201
H157 dnCRTC	PDK4	36.939	34.9241	19.8987	4.16378	0.0557925
H157 dnCRTC	PDK4	33.5849	34.9241	16.5446	0.809593	0.570543
H157 dnCRTC	PDK4	34.2485	34.9241	17.2082	1.47328	0.360162
H322 GFP	LINC00473	34.0148	33.4191	17.2002	0.595755	0.661698
H322 GFP	LINC00473	33.5947	33.4191	16.7801	0.175652	0.885367
H322 GFP	LINC00473	32.6477	33.4191	15.8331	-0.771396	1.70692
H322 dnCRTC	LINC00473	34.6988	34.0486	17.7362	1.13171	0.456375
H322 dnCRTC	LINC00473	34.2497	34.0486	17.2871	0.682606	0.623039
H322 dnCRTC	LINC00473	33.1973	34.0486	16.2347	-0.369758	1.29214
H522 GFP	LINC00473	32.0417	32.9198	14.0495	-2.55493	5.87637
H522 GFP	LINC00473	32.2282	32.9198	14.2361	-2.36839	5.16365
H522 GFP	LINC00473	34.4894	32.9198	16.4972	-0.107207	1.07714
H522 dnCRTC	LINC00473	31.1641	32.2002	13.2468	-3.35769	10.251
H522 dnCRTC	LINC00473	32.8961	32.2002	14.9788	-1.62565	3.08582
H522 dnCRTC	LINC00473	32.5404	32.2002	14.6231	-1.98136	3.94865
A549 GFP	LINC00473	24.3106	24.1526	7.28414	-9.32031	639.285
A549 GFP	LINC00473	24.1207	24.1526	7.09424	-9.51021	729.221
A549 GFP	LINC00473	24.0266	24.1526	7.00016	-9.60429	778.36
A549 dnCRTC	LINC00473	28.8769	29.1121	12.0011	-4.60333	24.3075
A549 dnCRTC	LINC00473	29.1784	29.1121	12.3026	-4.30181	19.7231
A549 dnCRTC	LINC00473	29.2811	29.1121	12.4053	-4.19913	18.3682
H157 GFP	LINC00473	22.0912	22.1812	5.24837	-11.3561	2621.32
H157 GFP	LINC00473	22.3851	22.1812	5.54226	-11.0622	2138.21
H157 GFP	LINC00473	22.0673	22.1812	5.22445	-11.38	2665.15
H157 dnCRTC	LINC00473	26.9891	26.6896	9.94885	-6.6556	100.817
H157 dnCRTC	LINC00473	26.7473	26.6896	9.70699	-6.89746	119.218
H157 dnCRTC	LINC00473	26.3322	26.6896	9.29192	-7.31253	158.961
H322 GFP	NR4A1	32.332	32.5968	15.5174	-0.264782	1.20145
H322 GFP	NR4A1	31.9684	32.5968	15.1538	-0.628391	1.54584
H322 GFP	NR4A1	33.49	32.5968	16.6753	0.893179	0.538426
H322 dnCRTC	NR4A1	33.2239	34.3094	16.2613	0.479125	0.717413
H322 dnCRTC	NR4A1	35.4895	34.3094	18.5269	2.7447	0.149198
H322 dnCRTC	NR4A1	34.2149	34.3094	17.2522	1.47008	0.360961
H522 GFP	NR4A1	32.3859	32.9937	14.3937	-1.38841	2.6179
H522 GFP	NR4A1	33.6978	32.9937	15.7057	-0.0764837	1.05444
H522 GFP	NR4A1	32.8974	32.9937	14.9052	-0.876924	1.83646
H522 dnCRTC	NR4A1	34.5894	33.7581	16.6721	0.889939	0.539637
H522 dnCRTC	NR4A1	33.567	33.7581	15.6496	-0.132526	1.09621
H522 dnCRTC	NR4A1	33.1178	33.7581	15.2004	-0.581751	1.49666
A549 GFP	NR4A1	25.2313	25.5599	8.20487	-7.57728	190.98
A549 GFP	NR4A1	25.5066	25.5599	8.48021	-7.30194	157.799
A549 GFP	NR4A1	25.9418	25.5599	8.91534	-6.86681	116.712
A549 dnCRTC	NR4A1	26.9567	26.7996	10.0809	-5.70124	52.029
A549 dnCRTC	NR4A1	26.536	26.7996	9.66027	-6.12188	69.6416
A549 dnCRTC	NR4A1	26.9062	26.7996	10.0304	-5.75172	53.8817
H157 GFP	NR4A1	31.3183	31.4872	14.4754	-1.30672	2.47378
H157 GFP	NR4A1	31.8954	31.4872	15.0526	-0.729596	1.65817
H157 GFP	NR4A1	31.2478	31.4872	14.405	-1.3772	2.59763
H157 dnCRTC	NR4A1	32.6271	32.6383	15.5868	-0.19532	1.14498
H157 dnCRTC	NR4A1	32.589	32.6383	15.5487	-0.233447	1.17564
H157 dnCRTC	NR4A1	32.6987	32.6383	15.6584	-0.123747	1.08956
H322 GFP	TMSF20	35.2901	33.9728	18.4755	1.31729	0.401288
H322 GFP	TMSF20	32.6598	33.9728	15.8452	-1.31297	2.48453
H322 GFP	TMSF20	33.9685	33.9728	17.1538	-0.00432059	1.003
H322 dnCRTC	TMSF20	35.5288	34.6093	18.5661	1.40796	0.376843
H322 dnCRTC	TMSF20	35.184	34.6093	18.2213	1.06317	0.478578
H322 dnCRTC	TMSF20	33.1151	34.6093	16.1525	-1.00568	2.00788
H522 GFP	TMSF20	36.9501	34.5523	18.9579	1.79974	0.287225
H522 GFP	TMSF20	34.1585	34.5523	16.1663	-0.991894	1.98879
H522 GFP	TMSF20	32.5485	34.5523	14.5563	-2.60184	6.07062
H522 dnCRTC	TMSF20	36.787	35.1068	18.8696	1.71143	0.305357
H522 dnCRTC	TMSF20	33.1183	35.1068	15.2009	-1.95727	3.88326
H522 dnCRTC	TMSF20	35.4152	35.1068	17.4978	0.339649	0.790234
A549 GFP	TMSF20	21.2639	21.768	4.23747	-12.9207	7753.87
A549 GFP	TMSF20	22.0414	21.768	5.01496	-12.1432	4523.45
A549 GFP	TMSF20	21.9986	21.768	4.97215	-12.186	4659.7
A549 dnCRTC	TMSF20	24.2042	24.0439	7.32843	-9.82974	910.012
A549 dnCRTC	TMSF20	24.0346	24.0439	7.15886	-9.99931	1023.51
A549 dnCRTC	TMSF20	23.8929	24.0439	7.01714	-10.141	1129.15
H157 GFP	TMSF20	21.5644	21.5496	4.72154	-12.4366	5543.7
H157 GFP	TMSF20	21.1256	21.5496	4.2828	-12.8754	7514.01
H157 GFP	TMSF20	21.9588	21.5496	5.11595	-12.0422	4217.63
H157 dnCRTC	TMSF20	26.4587	26.3985	9.41839	-7.73978	213.749
H157 dnCRTC	TMSF20	26.5818	26.3985	9.5415	-7.61667	196.266
H157 dnCRTC	TMSF20	26.155	26.3985	9.11468	-8.04349	263.834
H322 GFP	NR4A3	26.7873	26.683	9.97263	0.104316	0.930246
H322 GFP	NR4A3	26.8427	26.683	10.0281	0.159742	0.895185
H322 GFP	NR4A3	26.4189	26.683	9.60426	-0.264058	1.20085
H322 dnCRTC	NR4A3	26.6036	26.6271	9.64097	-0.227352	1.17068
H322 dnCRTC	NR4A3	26.4128	26.6271	9.45014	-0.418172	1.33623
H322 dnCRTC	NR4A3	26.8648	26.6271	9.90215	0.0338376	0.976818
H522 GFP	NR4A3	29.8505	29.4624	11.8583	1.98999	0.25174
H522 GFP	NR4A3	28.968	29.4624	10.9758	1.10751	0.464095
H522 GFP	NR4A3	29.5686	29.4624	11.5764	1.70809	0.306065
H522 dnCRTC	NR4A3	30.0252	29.6537	12.1079	2.23955	0.211752
H522 dnCRTC	NR4A3	29.7884	29.6537	11.871	2.00273	0.249527
H522 dnCRTC	NR4A3	29.1476	29.6537	11.2302	1.36193	0.389061
A549 GFP	NR4A3	27.6777	27.2532	10.6512	0.782906	0.581195
A549 GFP	NR4A3	27.1509	27.2532	10.1244	0.256131	0.837331
A549 GFP	NR4A3	26.931	27.2532	9.90457	0.0362514	0.975186
A549 dnCRTC	NR4A3	28.9615	29.0615	12.0857	2.21738	0.215031
A549 dnCRTC	NR4A3	29.3301	29.0615	12.4543	2.58602	0.166545
A549 dnCRTC	NR4A3	28.8929	29.0615	12.0171	2.14883	0.225496
H157 GFP	NR4A3	27.2896	27.2991	10.4468	0.578437	0.669689
H157 GFP	NR4A3	26.9658	27.2991	10.123	0.254677	0.838175
H157 GFP	NR4A3	27.6417	27.2991	10.7989	0.930587	0.524645
H157 dnCRTC	NR4A3	28.1705	28.1018	11.1302	1.2619	0.416996
H157 dnCRTC	NR4A3	28.1476	28.1018	11.1073	1.23895	0.423682
H157 dnCRTC	NR4A3	27.9875	28.1018	10.9472	1.07886	0.473404
H322 GFP	PTGS2	28.2992	28.5298	11.4845	-0.230656	1.17337
H322 GFP	PTGS2	28.3484	28.5298	11.5338	-0.181391	1.13398
H322 GFP	PTGS2	28.9419	28.5298	12.1272	0.412039	0.75156
H322 dnCRTC	PTGS2	28.4009	28.1426	11.4383	-0.276914	1.2116
H322 dnCRTC	PTGS2	27.9122	28.1426	10.9495	-0.765675	1.70017
H322 dnCRTC	PTGS2	28.1146	28.1426	11.152	-0.563213	1.47756
H522 GFP	PTGS2	30.5838	30.6657	12.5916	0.876395	0.544727
H522 GFP	PTGS2	30.1486	30.6657	12.1564	0.441236	0.736503
H522 GFP	PTGS2	31.2648	30.6657	13.2726	1.55741	0.339761
H522 dnCRTC	PTGS2	31.2833	31.8879	13.366	1.65078	0.318467
H522 dnCRTC	PTGS2	32.9655	31.8879	15.0481	3.33293	0.0992401
H522 dnCRTC	PTGS2	31.4149	31.8879	13.4975	1.78231	0.290718
A549 GFP	PTGS2	18.9458	19.1524	1.91941	-9.79579	888.845
A549 GFP	PTGS2	19.2665	19.1524	2.24004	-9.47516	711.716
A549 GFP	PTGS2	19.2448	19.1524	2.21838	-9.49682	722.485
A549 dnCRTC	PTGS2	21.5286	21.1228	4.65283	-7.06237	133.655
A549 dnCRTC	PTGS2	20.8869	21.1228	4.01109	-7.70411	208.53
A549 dnCRTC	PTGS2	20.9531	21.1228	4.07729	-7.63791	199.178
H157 GFP	PTGS2	19.4744	19.8794	2.63157	-9.08363	542.556
H157 GFP	PTGS2	19.9148	19.8794	3.07193	-8.64327	399.836
H157 GFP	PTGS2	20.2489	19.8794	3.40605	-8.30915	317.177
H157 dnCRTC	PTGS2	22.4294	22.5776	5.38908	-6.32612	80.2326
H157 dnCRTC	PTGS2	22.5891	22.5776	5.54884	-6.16636	71.8222
H157 dnCRTC	PTGS2	22.7142	22.5776	5.67388	-6.04132	65.8593
H322 GFP	SIK1	26.7927	26.4552	9.97803	0.337444	0.791442
H322 GFP	SIK1	26.1485	26.4552	9.33382	-0.306768	1.23693
H322 GFP	SIK1	26.4245	26.4552	9.60991	-0.0306776	1.02149
H322 dnCRTC	SIK1	26.6818	26.7333	9.71916	0.0785757	0.946992
H322 dnCRTC	SIK1	27.1585	26.7333	10.1958	0.55524	0.680544
H322 dnCRTC	SIK1	26.3595	26.7333	9.39684	-0.24374	1.18406
H522 GFP	SIK1	26.8751	26.6134	8.88295	-0.757631	1.69071
H522 GFP	SIK1	26.3785	26.6134	8.38637	-1.25422	2.38538
H522 GFP	SIK1	26.5865	26.6134	8.59438	-1.04621	2.0651
H522 dnCRTC	SIK1	26.8418	26.5396	8.92443	-0.71616	1.6428
H522 dnCRTC	SIK1	26.4585	26.5396	8.54111	-1.09948	2.14277
H522 dnCRTC	SIK1	26.3185	26.5396	8.40119	-1.2394	2.361
A549 GFP	SIK1	22.5031	22.7796	5.47667	-4.16391	17.9251
A549 GFP	SIK1	22.8953	22.7796	5.86889	-3.7717	13.6582
A549 GFP	SIK1	22.9403	22.7796	5.9139	-3.72669	13.2387
A549 dnCRTC	SIK1	23.5694	23.3065	6.69361	-2.94697	7.7113
A549 dnCRTC	SIK1	23.187	23.3065	6.31119	-3.32939	10.0519
A549 dnCRTC	SIK1	23.1633	23.3065	6.28751	-3.35307	10.2182
H157 GFP	SIK1	22.7254	22.5778	5.88256	-3.75802	13.5294
H157 GFP	SIK1	22.6895	22.5778	5.84665	-3.79393	13.8703
H157 GFP	SIK1	22.3185	22.5778	5.47563	-4.16495	17.938
H157 dnCRTC	SIK1	24.7818	24.5122	7.74149	-1.8991	3.72979
H157 dnCRTC	SIK1	24.595	24.5122	7.5547	-2.08588	4.24535
H157 dnCRTC	SIK1	24.1597	24.5122	7.11938	-2.52121	5.74062
H322 GFP	PDE4B	35.9565	35.2103	19.1418	0.746214	0.596166
H322 GFP	PDE4B	35.5485	35.2103	18.7339	0.338249	0.791001
H322 GFP	PDE4B	34.1258	35.2103	17.3112	-1.08446	2.12058
H322 dnCRTC	PDE4B	31.9818	32.2117	15.0191	-3.37651	10.3856
H322 dnCRTC	PDE4B	32.895	32.2117	15.9323	-2.46328	5.51467
H322 dnCRTC	PDE4B	31.7584	32.2117	14.7957	-3.59988	12.1247
H522 GFP	PDE4B	37.1566	35.3071	19.1644	0.768761	0.586921
H522 GFP	PDE4B	35.179	35.3071	17.1868	-1.20881	2.31147
H522 GFP	PDE4B	33.5857	35.3071	15.5935	-2.80209	6.97452
H522 dnCRTC	PDE4B	32.5753	34.3177	14.658	-3.73767	13.3398
H522 dnCRTC	PDE4B	38.219	34.3177	20.3016	1.90602	0.266828
H522 dnCRTC	PDE4B	32.1587	34.3177	14.2413	-4.15429	17.806
A549 GFP	PDE4B	24.807	24.7832	7.7806	-10.615	1568.34
A549 GFP	PDE4B	24.732	24.7832	7.70553	-10.6901	1652.1
A549 GFP	PDE4B	24.8106	24.7832	7.78416	-10.6115	1564.47
A549 dnCRTC	PDE4B	26.0543	25.9486	9.17851	-9.21711	595.152
A549 dnCRTC	PDE4B	25.9033	25.9486	9.02751	-9.36811	660.821
A549 dnCRTC	PDE4B	25.8882	25.9486	9.01239	-9.38323	667.782
H157 GFP	PDE4B	18.681	18.4518	1.83815	-16.5575	96448.6
H157 GFP	PDE4B	18.2146	18.4518	1.37171	-17.0239	133262
H157 GFP	PDE4B	18.4598	18.4518	1.61695	-16.7787	112430
H157 dnCRTC	PDE4B	20.9479	20.8314	3.90765	-14.488	22978.1
H157 dnCRTC	PDE4B	20.5476	20.8314	3.50728	-14.8883	30327.5
H157 dnCRTC	PDE4B	20.9986	20.8314	3.95827	-14.4373	22185.8
H322 GFP	PDE4D	29.9408	29.9094	13.1262	0.0314601	0.97843
H322 GFP	PDE4D	29.159	29.9094	12.3443	-0.75038	1.68224
H322 GFP	PDE4D	30.6283	29.9094	13.8136	0.718919	0.607552
H322 dnCRTC	PDE4D	29.9346	29.7624	12.972	-0.122746	1.08881
H322 dnCRTC	PDE4D	30.1793	29.7624	13.2166	0.121883	0.918988
H322 dnCRTC	PDE4D	29.1733	29.7624	12.2106	-0.884077	1.84558
H522 GFP	PDE4D	30.6667	31.295	12.6746	-0.420159	1.33807
H522 GFP	PDE4D	31.9635	31.295	13.9713	0.876592	0.544653
H522 GFP	PDE4D	31.2549	31.295	13.2627	0.168002	0.890074
H522 dnCRTC	PDE4D	30.7919	30.6218	12.8745	-0.220172	1.16487
H522 dnCRTC	PDE4D	30.1179	30.6218	12.2005	-0.894174	1.85855
H522 dnCRTC	PDE4D	30.9555	30.6218	13.0381	-0.0565866	1.04
A549 GFP	PDE4D	21.208	21.0542	4.18162	-8.9131	482.072
A549 GFP	PDE4D	21.0554	21.0542	4.02893	-9.06579	535.889
A549 GFP	PDE4D	20.8993	21.0542	3.87285	-9.22187	597.118
A549 dnCRTC	PDE4D	22.199	22.1439	5.32319	-7.77153	218.506
A549 dnCRTC	PDE4D	22.1253	22.1439	5.24952	-7.8452	229.954
A549 dnCRTC	PDE4D	22.1074	22.1439	5.23168	-7.86304	232.816
H157 GFP	PDE4D	21.9012	22.1383	5.05833	-8.03639	262.539
H157 GFP	PDE4D	22.1448	22.1383	5.30195	-7.79277	221.746
H157 GFP	PDE4D	22.3689	22.1383	5.52605	-7.56867	189.843
H157 dnCRTC	PDE4D	25.8301	25.8519	8.78977	-4.30495	19.766
H157 dnCRTC	PDE4D	26.1003	25.8519	9.05996	-4.03476	16.3902
H157 dnCRTC	PDE4D	25.6253	25.8519	8.585	-4.50972	22.7803
H322 GFP	ID1	20.6551	20.9087	3.84042	-0.253689	1.19225
H322 GFP	ID1	21.1034	20.9087	4.28876	0.194657	0.873781
H322 GFP	ID1	20.9678	20.9087	4.15314	0.0590327	0.959908
H322 dnCRTC	ID1	20.96	21.0911	3.99735	-0.0967508	1.06936
H322 dnCRTC	ID1	20.9857	21.0911	4.02304	-0.0710594	1.05049
H322 dnCRTC	ID1	21.3277	21.0911	4.36504	0.270941	0.828779
H522 GFP	ID1	21.1905	21.2487	3.19828	-0.895825	1.86067
H522 GFP	ID1	21.5697	21.2487	3.57753	-0.516578	1.43056
H522 GFP	ID1	20.9858	21.2487	2.99363	-1.10048	2.14426
H522 dnCRTC	ID1	21.2928	20.6463	3.37546	-0.71864	1.64563
H522 dnCRTC	ID1	20.2981	20.6463	2.38075	-1.71335	3.27922
H522 dnCRTC	ID1	20.3479	20.6463	2.43055	-1.66355	3.16796
A549 GFP	ID1	20.9471	21.1897	3.92064	-0.173464	1.12776
A549 GFP	ID1	21.3407	21.1897	4.31424	0.220138	0.858483
A549 GFP	ID1	21.2814	21.1897	4.25494	0.160835	0.894507
A549 dnCRTC	ID1	22.1529	22.3853	5.27709	1.18299	0.440438
A549 dnCRTC	ID1	22.3188	22.3853	5.44305	1.34895	0.392578
A549 dnCRTC	ID1	22.6841	22.3853	5.80836	1.71426	0.30476
H157 GFP	ID1	21.7729	21.3751	4.93001	0.835908	0.56023
H157 GFP	ID1	21.0332	21.3751	4.19031	0.0962054	0.93549
H157 GFP	ID1	21.3194	21.3751	4.47653	0.38243	0.767144
H157 dnCRTC	ID1	22.9731	22.8016	5.9328	1.83869	0.279575
H157 dnCRTC	ID1	22.935	22.8016	5.8947	1.80059	0.287056
H157 dnCRTC	ID1	22.4968	22.8016	5.45655	1.36245	0.388922
H322 GFP	GAPDH	16.6526	16.8146
H322 GFP	GAPDH	16.8547	16.8146
H322 GFP	GAPDH	16.9366	16.8146
H322 dnCRTC	GAPDH	16.4642	16.9627
H322 dnCRTC	GAPDH	17.2017	16.9627
H322 dnCRTC	GAPDH	17.222	16.9627
H522 GFP	GAPDH	18.9829	17.9922
H522 GFP	GAPDH	17.6359	17.9922
H522 GFP	GAPDH	17.3578	17.9922
H522 dnCRTC	GAPDH	18.8587	17.9174
H522 dnCRTC	GAPDH	17.2586	17.9174
H522 dnCRTC	GAPDH	17.6347	17.9174
A549 GFP	GAPDH	16.9587	17.0264
A549 GFP	GAPDH	16.551	17.0264
A549 GFP	GAPDH	17.5696	17.0264
A549 dnCRTC	GAPDH	16.9004	16.8758
A549 dnCRTC	GAPDH	16.9049	16.8758
A549 dnCRTC	GAPDH	16.822	16.8758
H157 GFP	GAPDH	16.4445	16.8428
H157 GFP	GAPDH	16.9582	16.8428
H157 GFP	GAPDH	17.1258	16.8428
H157 dnCRTC	GAPDH	16.4692	17.0403
H157 dnCRTC	GAPDH	17.3014	17.0403
H157 dnCRTC	GAPDH	17.3504	17.0403
