# Supplementary material for: Dependency of human and murine LKB1-inactivated lung cancer on aberrant CRTC-CREB activation
Source: eLife. 2021 Jun 18;10:e66095. doi: 10.7554/eLife.66095 (PMC8238510; doi:10.7554/eLife.66095)
Supplement: Figure 4—figure supplement 2—source data 1. [file elife-66095-fig4-figsupp2-data1.xlsx]

## Sheet: LKB1 KO qPCR
Sample Name	Target Name	Cт value	Cт Mean	dt (Ct (target-GAPDH))	ddt (Normalize to H322-Cas9-gNT)	Fold change
H322 Cas9 gNT	INSL4	40	36.9578	23.289	1.01406	0.49515
H322 Cas9 gNT	INSL4	36.9578	36.9578	20.2468	-2.02813	4.07875
H322 Cas9 gNT	INSL4	40	36.9578	23.289	1.01406	0.49515
H322 Cas9 gLKB1-1	INSL4	35.0798	34.332	17.3167	-4.95822	31.0866
H322 Cas9 gLKB1-1	INSL4	33.8031	34.332	16.04	-6.23493	75.3185
H322 Cas9 gLKB1-1	INSL4	34.113	34.332	16.3498	-5.92508	60.7614
H322 Cas9 gLKB1-2	INSL4	35.3218	35.9966	17.4227	-4.85223	28.8845
H322 Cas9 gLKB1-2	INSL4	36.899	35.9966	19	-3.27494	9.67958
H322 Cas9 gLKB1-2	INSL4	35.7691	35.9966	17.87	-4.40488	21.1837
A549 PA	INSL4	20.6753	20.5013	3.64888	-18.626	404568
A549 PA	INSL4	20.713	20.5013	3.68655	-18.5883	394140
A549 PA	INSL4	20.1155	20.5013	3.08905	-19.1858	596369
H322 Cas9 gNT	CPS1	30.9866	30.8631	14.2756	0.123466	0.91798
H322 Cas9 gNT	CPS1	30.9504	30.8631	14.2394	0.0872703	0.941302
H322 Cas9 gNT	CPS1	30.6524	30.8631	13.9414	-0.210722	1.15727
H322 Cas9 gLKB1-1	CPS1	30.8362	32.3982	13.0731	-1.07899	2.11256
H322 Cas9 gLKB1-1	CPS1	30.2852	32.3982	12.5221	-1.63001	3.09516
H322 Cas9 gLKB1-1	CPS1	30.0731	32.3982	12.3099	-1.84216	3.58547
H322 Cas9 gLKB1-2	CPS1	30.5491	30.663	12.65	-1.50207	2.83249
H322 Cas9 gLKB1-2	CPS1	30.8278	30.663	12.9288	-1.22334	2.33486
H322 Cas9 gLKB1-2	CPS1	30.612	30.663	12.7129	-1.43917	2.71164
A549 PA	CPS1	22.6462	22.5718	5.61978	-8.53232	370.241
A549 PA	CPS1	22.559	22.5718	5.53261	-8.61949	393.3
A549 PA	CPS1	22.5101	22.5718	5.48367	-8.66843	406.872
H322 Cas9 gNT	NR4A2	26.2806	26.5041	9.56958	-0.223436	1.16751
H322 Cas9 gNT	NR4A2	26.9554	26.5041	10.2443	0.45131	0.731379
H322 Cas9 gNT	NR4A2	26.2762	26.5041	9.56514	-0.227874	1.17111
H322 Cas9 gLKB1-1	NR4A2	26.0349	26.0241	8.27173	-1.52129	2.87048
H322 Cas9 gLKB1-1	NR4A2	26.0602	26.0241	8.29707	-1.49595	2.8205
H322 Cas9 gLKB1-1	NR4A2	25.9773	26.0241	8.21415	-1.57887	2.98736
H322 Cas9 gLKB1-2	NR4A2	26.9701	26.9626	9.07101	-0.722009	1.64948
H322 Cas9 gLKB1-2	NR4A2	26.9928	26.9626	9.09377	-0.699247	1.62366
H322 Cas9 gLKB1-2	NR4A2	26.9249	26.9626	9.02579	-0.767231	1.702
A549 PA	NR4A2	25.532	25.4021	8.50556	-1.28746	2.44098
A549 PA	NR4A2	25.516	25.4021	8.48957	-1.30345	2.46818
A549 PA	NR4A2	25.1582	25.4021	8.13177	-1.66125	3.1629
H322 Cas9 gNT	PDK4	32.9324	32.9457	16.2214	-0.013215	1.0092
H322 Cas9 gNT	PDK4	33.5776	32.9457	16.8665	0.631908	0.645323
H322 Cas9 gNT	PDK4	32.327	32.9457	15.6159	-0.618691	1.53548
H322 Cas9 gLKB1-1	PDK4	32.9265	35.7011	15.1634	-1.07124	2.10124
H322 Cas9 gLKB1-1	PDK4	32.8806	35.7011	15.1174	-1.11719	2.16925
H322 Cas9 gLKB1-1	PDK4	32.2961	35.7011	14.533	-1.70166	3.25274
H322 Cas9 gLKB1-2	PDK4	32.6984	32.7071	14.7993	-1.43533	2.70444
H322 Cas9 gLKB1-2	PDK4	32.97	32.7071	15.0709	-1.16373	2.24035
H322 Cas9 gLKB1-2	PDK4	32.4529	32.7071	14.5538	-1.68082	3.20611
A549 PA	PDK4	20.4199	20.756	3.39351	-12.8411	7337.66
A549 PA	PDK4	20.9262	20.756	3.89975	-12.3349	5166.14
A549 PA	PDK4	20.9219	20.756	3.89544	-12.3392	5181.58
H322 Cas9 gNT	GAPDH	16.9184	16.711
H322 Cas9 gNT	GAPDH	16.6485	16.711
H322 Cas9 gNT	GAPDH	16.5662	16.711
H322 Cas9 gLKB1-1	GAPDH	17.8723	17.7631
H322 Cas9 gLKB1-1	GAPDH	17.7055	17.7631
H322 Cas9 gLKB1-1	GAPDH	17.7115	17.7631
H322 Cas9 gLKB1-2	GAPDH	17.9443	17.8991
H322 Cas9 gLKB1-2	GAPDH	17.8724	17.8991
H322 Cas9 gLKB1-2	GAPDH	17.8805	17.8991
A549 PA	GAPDH	16.9587	17.0264
A549 PA	GAPDH	16.551	17.0264
A549 PA	GAPDH	17.5696	17.0264
