# Supplementary material for: Dependency of human and murine LKB1-inactivated lung cancer on aberrant CRTC-CREB activation
Source: eLife. 2021 Jun 18;10:e66095. doi: 10.7554/eLife.66095 (PMC8238510; doi:10.7554/eLife.66095)
Supplement: Figure 4—source data 2. [file elife-66095-fig4-data2.xlsx]

## Sheet: Figure 4D qPCR assay
Sample Name	Target Name	Cт value	Cт Mean	dt (Ct (target-GAPDH))	ddt (Normalize to A549-GFP sample)	Fold change
A549 GFP	INSL4	21.1875	21.2304	4.26661	-0.0428686	1.03016
A549 GFP	INSL4	21.2733	21.2304	4.35234	0.0428686	0.970723
A549 dnCRTC	INSL4	27.074	26.9491	10.4952	6.18568	0.013738
A549 dnCRTC	INSL4	26.8243	26.9491	10.2455	5.93598	0.0163339
A549 GFP	CPS1	21.9197	21.8952	4.99875	0.0244715	0.983181
A549 GFP	CPS1	21.8707	21.8952	4.94981	-0.0244711	1.01711
A549 dnCRTC	CPS1	24.6461	24.6295	8.06728	3.09299	0.117197
A549 dnCRTC	CPS1	24.6129	24.6295	8.03405	3.05977	0.119927
A549 GFP	NR4A2	24.7319	24.7142	7.81099	0.0177562	0.987768
A549 GFP	NR4A2	24.6964	24.7142	7.77548	-0.0177567	1.01238
A549 dnCRTC	NR4A2	27.546	27.6623	10.9672	3.17397	0.1108
A549 dnCRTC	NR4A2	27.7786	27.6623	11.1998	3.40653	0.0943044
A549 GFP	PDK4	20.9219	20.924	4.00094	-0.00215186	1.00149
A549 GFP	PDK4	20.9262	20.924	4.00525	0.00215112	0.99851
A549 dnCRTC	PDK4	23.9314	23.9302	7.35263	3.34954	0.0981045
A549 dnCRTC	PDK4	23.929	23.9302	7.35025	3.34715	0.0982668
A549 GFP	LINC00473	25.9944	26.0285	9.07343	-0.0341069	1.02392
A549 GFP	LINC00473	26.0626	26.0285	9.14164	0.0341075	0.976636
A549 dnCRTC	LINC00473	30.8861	30.8567	14.3073	5.19975	0.0272094
A549 dnCRTC	LINC00473	30.8273	30.8567	14.2485	5.14093	0.0283418
A549 GFP	NR4A1	25.9418	25.7242	9.02084	0.217568	0.860014
A549 GFP	NR4A1	25.5066	25.7242	8.58571	-0.217567	1.16277
A549 dnCRTC	NR4A1	26.9062	26.7211	10.3274	1.52413	0.34769
A549 dnCRTC	NR4A1	26.536	26.7211	9.95725	1.15397	0.449386
A549 GFP	TM4SF20	22.0414	22.02	5.12046	0.0214063	0.985272
A549 GFP	TM4SF20	21.9986	22.02	5.07765	-0.021406	1.01495
A549 dnCRTC	TM4SF20	24.0346	23.9638	7.45584	2.35678	0.195226
A549 dnCRTC	TM4SF20	23.8929	23.9638	7.31412	2.21506	0.215377
A549 GFP	NR4A3	29.931	30.0409	13.0101	-0.109939	1.07918
A549 GFP	NR4A3	30.1509	30.0409	13.2299	0.10994	0.926627
A549 dnCRTC	NR4A3	30.6643	30.9972	14.0855	0.9655	0.512101
A549 dnCRTC	NR4A3	31.3301	30.9972	14.7513	1.6313	0.322797
A549 GFP	PTGS2	19.2665	19.2556	2.34554	0.0108328	0.992519
A549 GFP	PTGS2	19.2448	19.2556	2.32388	-0.0108328	1.00754
A549 dnCRTC	PTGS2	20.8869	20.92	4.30806	1.97335	0.254661
A549 dnCRTC	PTGS2	20.9531	20.92	4.37426	2.03955	0.24324
A549 GFP	SIK1	20.1505	20.1147	3.22952	0.0357277	0.97554
A549 GFP	SIK1	20.079	20.1147	3.15807	-0.0357273	1.02507
A549 dnCRTC	SIK1	20.5744	20.5812	3.99562	0.801824	0.573624
A549 dnCRTC	SIK1	20.588	20.5812	4.00919	0.815397	0.568252
A549 GFP	PDE4B	24.732	24.7713	7.81103	-0.0393068	1.02762
A549 GFP	PDE4B	24.8106	24.7713	7.88966	0.0393199	0.973114
A549 dnCRTC	PDE4B	25.9033	25.8957	9.32448	1.47414	0.359947
A549 dnCRTC	PDE4B	25.8882	25.8957	9.30936	1.45902	0.363739
A549 GFP	PDE4D	20.416	20.338	3.49508	0.0780412	0.947343
A549 GFP	PDE4D	20.2599	20.338	3.33899	-0.0780409	1.05558
A549 dnCRTC	PDE4D	20.8407	20.8317	4.26186	0.844822	0.556779
A549 dnCRTC	PDE4D	20.8228	20.8317	4.24401	0.826979	0.563708
A549 GFP	GAPDH	16.9229	16.9209
A549 GFP	GAPDH	16.919	16.9209
A549 dnCRTC	GAPDH	16.516	16.5788
A549 dnCRTC	GAPDH	16.6416	16.5788
