# Supplementary material for: Dependency of human and murine LKB1-inactivated lung cancer on aberrant CRTC-CREB activation
Source: eLife. 2021 Jun 18;10:e66095. doi: 10.7554/eLife.66095 (PMC8238510; doi:10.7554/eLife.66095)
Supplement: Figure 5—figure supplement 1—source data 2. [file elife-66095-fig5-figsupp1-data2.xlsx]

## Sheet: Fig 5-fig. suppl. C
	cell numbers (n * 10^6)
Samples	GFP			dnCRTC
	replicate 1	replicate 2	replicate 3	replicate 1	replicate 2	replicate 3
BEAS-2B	1.38	0.98	1.25	1.32	1.02	1.17

## Sheet: Fig 5-fig. suppl. F
	cell numbers (n * 10^6)
Samples	GFP			dnCRTC
	replicate 1	replicate 2	replicate 3	replicate 1	replicate 2	replicate 3
mLSCCLP	0.87	0.9	0.95	0.15	0.2	0.17

## Sheet: Fig 5-fig. suppl. G
Number of colonies per well
Samples	GFP			dnCRTC
	replicate 1	replicate 2	replicate 3	replicate 1	replicate 2	replicate 3
mLSCCLP	55	52	41	8	6	6
