# Supplementary material for: Dependency of human and murine LKB1-inactivated lung cancer on aberrant CRTC-CREB activation
Source: eLife. 2021 Jun 18;10:e66095. doi: 10.7554/eLife.66095 (PMC8238510; doi:10.7554/eLife.66095)
Supplement: Figure 5—source data 1. [file elife-66095-fig5-data1.xlsx]

## Sheet: Figure 5A competition assay
		Raw percentage of GF- positive cells (%)												Normalized percentage of GFP-positive cells (%, normalized to day3 sample)
		A549		H157		H522		H322						A549		H157		H522		H322
		GFP	dnCRTC	GFP	dnCRTC	GFP	dnCRTC	GFP	dnCRTC					GFP	dnCRTC	GFP	dnCRTC	GFP	dnCRTC	GFP	dnCRTC
Day 3	replicate 1	60.0678	57.4158	56.7222	46.8812	61.4825	48.5092	60.7573	45.4471			Day 3	replicate 1	101.888	102.118	101.755	102.448	102.403	100.828	102	101.819
	replicate 2	57.2494	54.4122	54.2017	44.1932	58.0089	47.2041	57.779	43.296				replicate 2	97.1069	96.7757	97.2332	96.5739	96.6171	98.1149	97	97
Day 6	replicate 1	59.6037	54.4323	55.0137	41.1407	60.9991	51.1683	62.933	42.3851			Day 6	replicate 1	101.1	96.8116	98.6899	89.9034	101.597	106.355	105.653	94.9593
	replicate 2	56.8081	51.764	52.122	38.2141	57.6258	49.2731	59.6948	40.384				replicate 2	96.3583	92.0659	93.5024	83.5081	95.9789	102.415	100.216	90.4761
Day 9	replicate 1	57.5016	44.5133	59.2709	32.9499	62.6833	47.2041	65.6719	43.8324			Day 9	replicate 1	97.5347	79.1699	106.327	72.0044	104.403	98.1149	110.251	98.2018
	replicate 2	60.2667	46.8741	62.3261	34.9901	62.6912	48.9926	68.8153	46.3335				replicate 2	102.225	83.3688	111.808	76.4627	104.416	101.833	115.528	103.805
Day 12	replicate 1	64.1401	41.2939	62.7301	29.3011	64.8693	51.3848	71.0131	48.0336			Day 12	replicate 1	108.795	73.4439	112.532	64.0307	108.043	106.805	119.218	107.614
	replicate 2	62.1075	39.9399	60.8012	29.2187	59.6134	49.0843	68.749	46.452				replicate 2	105.347	71.0358	109.072	63.8507	99.2895	102.023	115.416	104.071
Day 15	replicate 1	63.0897	29.8051	61.715	18.7446	64.3905	48.0336	70.2152	41.8898			Day 15	replicate 1	107.013	53.0104	110.712	40.9619	107.246	99.8391	117.878	93.8496
	replicate 2	61.3431	28.6013	59.4223	18.3848	62.4005	46.452	68.5941	40.6455				replicate 2	104.051	50.8694	106.599	40.1757	103.932	96.5517	115.156	91.0619
Day 18	replicate 1	64.6425	27.3156	62.3261	18.0418	65.0281	48.5092	68.8153	42.3851			Day 18	replicate 1	109.647	48.5827	111.808	39.4261	108.308	100.828	115.528	94.9593
	replicate 2	62.1075	26.2444	59.8819	17.3342	62.4779	46.6068	66.1167	40.7229				replicate 2	105.347	46.6775	107.423	37.8799	104.061	96.8736	110.997	91.2354
Day 21	replicate 1	64.311	25.6581	62.8728	17.5634	62.1272	49.7984	69.8629	43.1103			Day 21	replicate 1	109.085	45.6347	112.788	38.3807	103.476	103.507	117.286	96.5841
	replicate 2	61.9801	24.1423	60.0132	16.415	59.8457	47.8456	66.8909	41.4197				replicate 2	105.131	42.9387	107.659	35.8712	99.6763	99.4483	112.297	92.7965
Day 24	replicate 1	64.3773	24.0669	62.7361	16.2649	62.6912	51.1683	69.0571	46.0918			Day 24	replicate 1	109.197	42.8046	112.543	35.5432	104.416	106.355	115.934	103.264
	replicate 2	62.1075	23.1231	59.9476	15.4958	60.2328	49.1617	66.3489	44.2842				replicate 2	105.347	41.126	107.541	33.8624	100.321	102.184	111.387	99.2142

## Sheet: Figure 5C cell number
	cell numbers (n * 10^6)
	Samples	GFP			dnCRTC
		1st replicate	2nd replicate	3rd replicate	1st replicate	2nd replicate	3rd replicate
	A549	2.1128	2.2312	2.246	0.6803	0.706	0.726
	H157	1.5212	1.4595	1.628	0.3882	0.3541	0.3124
	H522	0.3547	0.3349	0.3798	0.3374	0.4001	0.3485
	H322	0.896	0.8752	0.86	0.898	0.8349	0.8647

## Sheet: Figure 5D colony formation
	Number of colonies per well
	Samples	GFP			dnCRTC
		replicate 1	replicate 2	replicate 3	replicate 1	replicate 2	replicate 3
	A549	152	148	143	2	3	1
	H157	89	112	86	16	22	17
	H522	109	121	110	88	104	95
	H322	105	108	110	100	93	97

## Sheet: Figure 5e soft agar assay
	Number of colonies (per imaging field)
	Samples	GFP				dnCRTC
		replicate 1	replicate 2	replicate 3	replicate 4	replicate 1	replicate 2	replicate 3	replicate 4
	A549	36	32	34	40	8	9	12	15
	H157	26	25	34	28	5	6	8	6
	H522	28	32	31	37	38	43	31	26
	H322	42	39	40	42	40	37	38	40
