# Supplementary material for: Dependency of human and murine LKB1-inactivated lung cancer on aberrant CRTC-CREB activation
Source: eLife. 2021 Jun 18;10:e66095. doi: 10.7554/eLife.66095 (PMC8238510; doi:10.7554/eLife.66095)
Supplement: Figure 6—source data 1. [file elife-66095-fig6-data1.xlsx]

## Sheet: Figure 6A A549 tumor volume
	Tumor volume (mm3): two groups of NOD/SCID mice that were subcutaneously injected with A549-GFP or A549-dnCRTC cells
	Days (post injection)	GFP group (n=5)					dnCRTC group (n=5)
		Mouse 1	Mouse 2	Mouse 3	Mouse 4	Mouse 5	Mouse 1	Mouse 2	Mouse 3	Mouse 4	Mouse 5
	14	4.16	8.125	8.125	4.16	5.2	4.16	5.2	4.16	4.16	0.52
	16	4.16	9.75	8.125	5.2	5.2	4.16	5.2	4.16	4.16	0.78
	18	4.16	9.75	14.04	8.125	14.04	4.16	5.2	4.16	5.2	0.78
	20	8.125	14.04	22.295	8.125	14.04	4.16	5.2	4.16	5.2	0.78
	22	14.04	16.38	31.85	8.125	28.665	4.16	5.2	4.16	5.2	0.78
	24	14.04	16.38	52.65	9.75	71.5	4.16	5.2	4.16	5.2	0.78
	26	22.295	16.38	78	14.04	78	4.16	8.125	4.16	4.16	0.52
	28	28.665	16.38	121.68	14.04	94.38	5.2	8.125	4.16	5.2	0.52
	30	52.65	16.38	131.04	22.295	121.68	8.125	9.75	4.16	14.04	0.52
	32	78	25.48	153.79	33.28	153.79	8.125	14.04	4.16	16.38	0.52
	34	94.38	37.44	175.76	37.44	164.775	6.5	16.38	4.16	25.48	0.52
	36	102.245	47.385	203.84	71.5	203.84	14.04	22.295	4.16	33.28	0.52
	38	131.04	71.5	282.88	71.5	234	14.04	25.48	4.16	52.65	5.2
	40	191.1	165.62	316.16	94.38	492.765	25.48	16.38	4.16	65	8.125
	42	229.32	178.36	356.915	216.58	539.695	33.28	16.38	4.16	86.515	9.75
	44	349.44	203.84	659.295	263.25	859.625	33.28	25.48	4.16	121.68	14.04
	46	399.36	356.915	786.5	316.16	928.395	37.44	33.28	8.125	142.805	33.28
	48	432.64	692.12	817.96	356.915	928.395	71.5	37.44	14.04	153.79	37.44

## Sheet: Figure 6D A549 tumor weight
	Tumor weight (mg): two groups of NOD/SCID mice that were subcutaneously injected with A549-GFP or A549-dnCRTC cells
		GFP group (n=5)					dnCRTC group (n=5)
		Mouse 1	Mouse 2	Mouse 3	Mouse 4	Mouse 5	Mouse 1	Mouse 2	Mouse 3	Mouse 4	Mouse 5
	Tumor weight (mg)	392	413	518	163	224	51	115	132	131	93

## Sheet: Figure 6F H157 tumor volume
	Tumor volume (mm3): two groups of NOD/SCID mice that were subcutaneously injected with H157-GFP or H157-dnCRTC cells
	Days (post-injection)	GFP group (n=5)					dnCRTC group (n=5)
		Mouse 1	Mouse 2	Mouse 3	Mouse 4	Mouse 5	Mouse 1	Mouse 2	Mouse 3	Mouse 4	Mouse 5
	9	68.75	55.6875	50.625	75	55.6875	50.625	40	50.625	62.5	50.625
	10	81.25	75	60.75	81.25	75	55.6875	50.625	50.625	62.5	50.625
	11	113.438	105.875	81.25	126	126	60.75	50.625	50.625	68.75	62.5
	12	153	158.438	135	183.75	169	65.8125	62.5	50.625	75	68.75
	13	232.75	239.062	179.562	225	253.125	93.75	68.75	62.5	98.3125	83.1875
	14	336	325.125	232.75	288	343.188	128.562	90.75	68.75	105.875	90.75
	15	518.938	451.25	379.312	425.25	473.812	151.25	117	68.75	121	108
	16	716.625	575	518.938	661.5	661.5	173.938	137.312	75	162	117
	17	925.75	726	661.5	1008	936	225	117	90.75	180	126
	18	1267.5	900	936	1210.94	1225.25	252	147.875	108	211.25	158.438

## Sheet: Figure 6I H157 tumor weight
	Tumor weight (mg): two groups of NOD/SCID mice that were subcutaneously injected with H157-GFP or H157-dnCRTC cells
		GFP group (n=5)					dnCRTC group (n=5)
		Mouse 1	Mouse 2	Mouse 3	Mouse 4	Mouse 5	Mouse 1	Mouse 2	Mouse 3	Mouse 4	Mouse 5
	Tumor weight (mg)	1369	1119	988	635	475	552	412	212	188	151
