# Supplementary material for: Dependency of human and murine LKB1-inactivated lung cancer on aberrant CRTC-CREB activation
Source: eLife. 2021 Jun 18;10:e66095. doi: 10.7554/eLife.66095 (PMC8238510; doi:10.7554/eLife.66095)
Supplement: Figure 7—source data 1. [file elife-66095-fig7-data1.xlsx]

## Sheet: Figure 7B A549 tumor nodules
	Number of lung tumor nodules (per mouse): in two groups of NOD/SCID mice that were intravenously injected with A549-GFP or A549-dnCRTC cells
	GFP group (n=6)						dnCRTC group (n=6)
	mouse 1	mouse 2	mouse 3	mouse 4	mouse 5	mouse 6	mouse 1	mouse 2	mouse 3	mouse 4	mouse 5	mouse 6
Number of tumor nodules	290	87	143	127	142	55	12	1	7	9	1	6

## Sheet: Figure 7C A549 tumor area
	Tumor areas per mouse: in two groups of NOD/SCID mice that were intravenously injected with A549-GFP or A549-dnCRTC cells
	GFP group (n=6)						dnCRTC group (n=6)
	mouse 1	mouse 2	mouse 3	mouse 4	mouse 5	mouse 6	mouse 1	mouse 2	mouse 3	mouse 4	mouse 5	mouse 6
area of tumor (pixel2)	61374	52173	41099	64475	79266	138406	7776	6265	8581	14789	7186	4515
area of whole lung section (pixel2)	75024	113455	78478	163827	155662	297133	97987	70923	106738	181940	170518	132758
Percentage of tumor area (%)	81.8058	45.9856	52.3701	39.3555	50.9219	46.5805	7.93575	8.83352	8.03931	8.1285	4.21422	3.40092
Threshold setting (image J)	tumor	whole lung
min	0	255
max	120	255

## Sheet: Figure 7E H157 tumor nodules
		Number of lung tumor nodules (per mouse): in two groups of NOD/SCID mice that were intravenously injected with H157-GFP or H157-dnCRTC cells
		GFP group (n=6)						dnCRTC group (n=6)
		mouse 1	mouse 2	mouse 3	mouse 4	mouse 5	mouse 6	mouse 1	mouse 2	mouse 3	mouse 4	mouse 5	mouse 6
	Tumor nodules	95	109	92	90	87	105	0	0	3	2	1	8

## Sheet: Figure 7f H157 tumor area
	Tumor areas per mouse: in two groups of NOD/SCID mice that were intravenously injected with H157-GFP or H157-dnCRTC cells
	GFP group (n=6)						dnCRTC group (n=6)
	mouse 1	mouse 2	mouse 3	mouse 4	mouse 5	mouse 6	mouse 1	mouse 2	mouse 3	mouse 4	mouse 5	mouse 6
area of tumor (pixel2)	16170	83855	40074	80558	66013	143009	2941	5788	699	10204	3287	3086
area of whole lung section (pixel2)	98301	143702	130278	236833	218100	320547	136527	89413	92047	225947	190222	124655
Percentage of tumor area (%)	16.4495	58.3534	30.7604	34.0147	30.2673	44.6141	2.15415	6.47333	0.759395	4.5161	1.72798	2.47563
Threshold setting (image J)	tumor	whole lung
min	0	255
max	120	255
