# Supplementary material for: Dependency of human and murine LKB1-inactivated lung cancer on aberrant CRTC-CREB activation
Source: eLife. 2021 Jun 18;10:e66095. doi: 10.7554/eLife.66095 (PMC8238510; doi:10.7554/eLife.66095)
Supplement: Supplementary file 1. — (a) Differentially expressed genes in dnCRTC-expressing A549 lung cancer cells in comparison with GFP-expressing control cells were shown. (b) GSEA analysis revealed that multiple oncogenic signatures were negatively associated with the dnCRTC-regulated target genes. (c) Primer and sgRNA sequences used in this study. [file elife-66095-supp1.xlsx]

## Sheet: Suppl. File 1a
Supplementalry File 1a: Differentially expressed genes in dnCRTC-expressing A549 lung cancer cells in comparison with GFP-expressing control cells were shown. The cutoff criteria included an absolute fold change >= 2.0 and FDR <=0.05. Genes with the predicted CREB binding sites based on the CREB Target Gene Database (PMID:15753290), or CREB binding or CRTC2 binding from a ChIP-seq study (PMID: 31…
Probe Set ID	Gene Accession	Gene Symbol	Gene Description	Fold Change (dnCRTC/GFP)	FDR (dnCRTC vs GFP)	Predicted CREB site (-3kb to 300bp)	CREB binding (-3kb to 300bp)	CREB binding (-500b to 100bp)	CRTC2 binding (-3kb to 300bp)	CRTC2 binding (-500b to 100bp)
TC09000036.hg.1	NM_002195	INSL4	insulin-like 4 (placenta)	-218.82	9.15997e-07	CRE			Yes	Yes
TC02001246.hg.1	NM_001122633	CPS1	carbamoyl-phosphate synthase 1, mitochondrial	-33.5012	6.0476e-09	CRE
TC02002445.hg.1	NM_006186	NR4A2	nuclear receptor subfamily 4, group A, member 2	-26.3589	8.35759e-09	CRE	Yes	Yes	Yes	Yes
TC07001618.hg.1	NM_002612	PDK4	pyruvate dehydrogenase kinase, isozyme 4	-25.8701	7.65057e-09	CRE			Yes	Yes
TC06002302.hg.1	NR_026860	LINC00473	long intergenic non-protein coding RNA 473	-23.6308	1.00688e-06	CRE	Yes	Yes	Yes	Yes
TC12000414.hg.1	NM_001202233	NR4A1	nuclear receptor subfamily 4, group A, member 1	-18.782	6.35849e-08	CRE	Yes	Yes	Yes	Yes
TC02002835.hg.1	NM_024795	TM4SF20	transmembrane 4 L six family member 20	-17.3215	1.14174e-07
TC09000508.hg.1	NM_006981	NR4A3	nuclear receptor subfamily 4, group A, member 3	-16.4728	3.9356e-07	CRE	Yes	Yes	Yes	Yes
TC02001247.hg.1	NR_002763	CPS1-IT1	CPS1 intronic transcript 1 (non-protein coding)	-10.2711	1.01538e-05
TC01003638.hg.1	NM_000963	PTGS2	prostaglandin-endoperoxide synthase 2 (prostaglandin G/H synthase and cyclooxygenase)	-8.19898	2.36249e-05	CRE	Yes		Yes
TC21000506.hg.1	NM_173354	SIK1	salt-inducible kinase 1	-7.32694	1.61763e-06	CRE
TC07000562.hg.1	NM_001040152	PEG10	paternally expressed 10	-6.81895	1.10214e-06	CRE
TC10001569.hg.1	NM_021732	AVPI1	arginine vasopressin-induced 1	-6.52241	1.30015e-05	CRE	Yes	Yes	Yes	Yes
TC08001692.hg.1	OTTHUMT00000378943	RP11-10J21.4	novel transcript	-6.01546	2.3376e-05
TC01000757.hg.1	NM_001190463	CTH	cystathionine gamma-lyase	-5.84186	9.15997e-07	CRE	Yes	Yes	Yes	Yes
TC01001607.hg.1	NM_024420	PLA2G4A	phospholipase A2, group IVA (cytosolic, calcium-dependent)	-5.80411	1.00688e-06	CRE
TC06002300.hg.1	ENST00000535229	PDE10A	phosphodiesterase 10A	-5.59233	0.000616752	CRE			Yes
TC04000777.hg.1	NM_001184741	FGB	fibrinogen beta chain	-5.44933	7.38793e-06	CRE
TC04001382.hg.1	NM_198281	GPRIN3	GPRIN family member 3	-5.42546	1.12184e-05	CRE
TC10000968.hg.1	ENST00000459467	RNU7-163P	RNA, U7 small nuclear 163 pseudogene	-5.28515	0.00167555
TC12002012.hg.1	NM_001168325	TESC	tescalcin	-5.25147	6.94124e-07	CRE
TC04001662.hg.1	NM_000508	FGA	fibrinogen alpha chain	-5.02288	1.52948e-05
TC03001692.hg.1	NM_000187	HGD	homogentisate 1,2-dioxygenase	-4.87338	1.01538e-05	CRE
TC20000876.hg.1	NM_003064	SLPI	secretory leukocyte peptidase inhibitor	-4.7565	0.00098697	CRE
TC03001719.hg.1	NM_033049	MUC13	mucin 13, cell surface associated	-4.56657	4.6518e-06	CRE
TC12000687.hg.1	NM_006183	NTS	neurotensin	-4.35446	2.43389e-06	CRE
TC06001015.hg.1	NM_018945	PDE7B	phosphodiesterase 7B	-4.31212	1.52948e-05	CRE	Yes	Yes	Yes	Yes
TC02002733.hg.1	NM_001136574	LANCL1	LanC lantibiotic synthetase component C-like 1 (bacterial)	-4.29435	6.13946e-06		Yes	Yes	Yes	Yes
TC12000227.hg.1	NM_000921	PDE3A	phosphodiesterase 3A, cGMP-inhibited	-4.29361	4.29688e-06	CRE	Yes	Yes	Yes	Yes
TC01003555.hg.1	ENST00000422603	PTP4A1P7	protein tyrosine phosphatase type IVA, member 1 pseudogene 7	-4.24611	0.000129209
TC06002301.hg.1	ENST00000545867	SDIM1	stress responsive DNAJB4 interacting membrane protein 1	-4.16292	0.00203448
TC12003227.hg.1	NM_002281	KRT81	keratin 81	-4.10555	4.63154e-06
TC08001690.hg.1	NM_001080431	SLC45A4	solute carrier family 45, member 4	-4.08742	2.33053e-05		Yes	Yes	Yes	Yes
TC01000733.hg.1	NM_001037339	PDE4B	phosphodiesterase 4B, cAMP-specific	-4.023	3.94039e-06	CRE	Yes	Yes
TC05001389.hg.1	NM_001104631	PDE4D	phosphodiesterase 4D, cAMP-specific	-3.97652	1.49091e-06	CRE	Yes	Yes	Yes	Yes
TC02000281.hg.1	NM_001430	EPAS1	endothelial PAS domain protein 1	-3.92136	3.94039e-06	CRE			Yes	Yes
TC07001512.hg.1	ENST00000450426	LOC101926943	uncharacterized LOC101926943	-3.92127	8.64401e-06
TC07003364.hg.1	NM_000940	PON3	paraoxonase 3	-3.82127	7.88892e-06	CRE	Yes	Yes	Yes	Yes
TC16000501.hg.1	NM_001142302	CCDC113	coiled-coil domain containing 113	-3.61043	7.11751e-06	CRE	Yes	Yes	Yes	Yes
TC19001657.hg.1	NR_024258	SNAR-E	small ILF3/NF90-associated RNA E	-3.55606	0.00252731
TC16001140.hg.1	NM_018110	DOK4	docking protein 4	-3.55086	1.01538e-05	CRE	Yes	Yes	Yes
TC10000042.hg.1	OTTHUMT00000046537	RP11-499O7.7	novel transcript, antisense to AKR1C2	-3.54633	0.00142976
TC07000276.hg.1	NM_001003941	OGDH	oxoglutarate (alpha-ketoglutarate) dehydrogenase (lipoamide)	-3.52969	4.29688e-06	CRE
TC02000219.hg.1	NM_000627	LTBP1	latent transforming growth factor beta binding protein 1	-3.49163	9.60355e-06	CRE	Yes	Yes	Yes	Yes
TC14002318.hg.1	NM_015473	HEATR5A	HEAT repeat containing 5A	-3.46743	8.72043e-06		Yes		Yes
TC20000055.hg.1	NR_028370	PCNA-AS1	PCNA antisense RNA 1	-3.41178	0.000133254
TC09000593.hg.1	NM_002581	PAPPA	pregnancy-associated plasma protein A, pappalysin 1	-3.36766	1.72155e-05	CRE
TC10002952.hg.1	NM_001204300	ARHGAP19	Rho GTPase activating protein 19	-3.28736	1.39235e-05
TC06001156.hg.1	NM_021977	SLC22A3	solute carrier family 22 (organic cation transporter), member 3	-3.18426	2.18609e-05	CRE	Yes	Yes	Yes	Yes
TC19000321.hg.1	NM_016270	KLF2	Kruppel-like factor 2	-3.17346	0.000568742	CRE
TC0X000727.hg.1	NM_005342	HMGB3	high mobility group box 3	-3.13391	5.40251e-05	CRE
TC16000497.hg.1	AF452719	LOC388282	uncharacterized LOC388282	-3.13255	0.00115856		Yes	Yes	Yes	Yes
TC01004027.hg.1	NM_001821	CHML	choroideremia-like (Rab escort protein 2)	-3.11575	0.000259248
TC10000449.hg.1	NM_019058	DDIT4	DNA-damage-inducible transcript 4	-3.09855	3.35613e-05	CRE	Yes	Yes	Yes	Yes
TC11000464.hg.1	NM_178570	RTN4RL2	reticulon 4 receptor-like 2	-3.04033	3.06869e-05	CRE	Yes	Yes	Yes
TC05000097.hg.1	ENST00000517099	RNU6-1003P	RNA, U6 small nuclear 1003, pseudogene	-3.03166	0.00299196
TC12000311.hg.1	NM_001256063	CNTN1	contactin 1	-2.94558	5.90223e-06	CRE
TC02000147.hg.1	ENST00000363002	RNU6-942P	RNA, U6 small nuclear 942, pseudogene	-2.94294	0.00276317
TC06000697.hg.1	NM_003463	PTP4A1	protein tyrosine phosphatase type IVA, member 1	-2.92168	1.26662e-05	CRE
TC03001512.hg.1	NR_026582	ID2B	inhibitor of DNA binding 2B, dominant negative helix-loop-helix protein (pseudogene)	-2.89004	0.00256928
TC11001509.hg.1	NM_018490	LGR4	leucine-rich repeat containing G protein-coupled receptor 4	-2.83207	1.52383e-05	CRE
TC08001014.hg.1	NM_004467	FGL1	fibrinogen-like 1	-2.81873	3.8228e-05	CRE
TC20000398.hg.1	ENST00000411453	LINC01273	long intergenic non-protein coding RNA 1273	-2.78713	0.00155908		Yes	Yes	Yes	Yes
TC11001414.hg.1	NM_016422	RNF141	ring finger protein 141	-2.74003	0.000491298	CRE	Yes		Yes
TC22000627.hg.1	NM_001079539	XBP1	X-box binding protein 1	-2.73045	0.000124059	CRE	Yes	Yes
TC14000936.hg.1	NM_001126105	SLC7A7	solute carrier family 7 (amino acid transporter light chain, y+L system), member 7	-2.72424	9.39346e-05	CRE
TC6_apd_hap1000118.hg.1	NM_006120	HLA-DMA	major histocompatibility complex, class II, DM alpha	-2.70569	0.000364363		Yes	Yes
TC13000295.hg.1	NM_001160706	SCEL	sciellin	-2.68314	0.000217569	CRE
TC12001363.hg.1	NM_144973	DENND5B	DENN/MADD domain containing 5B	-2.67997	1.45316e-05	CRE	Yes	Yes	Yes	Yes
TC0X000901.hg.1	NM_001079858	GPR64	G protein-coupled receptor 64	-2.66794	9.10298e-05	CRE
TC01001976.hg.1	NM_003686	EXO1	exonuclease 1	-2.65896	1.26662e-05	CRE	Yes	Yes	Yes	Yes
TC19000688.hg.1	NR_004435	SNAR-A1	small ILF3/NF90-associated RNA A1	-2.62992	0.000218794
TC19000691.hg.1	NR_004436	SNAR-A2	small ILF3/NF90-associated RNA A2	-2.62992	0.000218794
TC19000689.hg.1	NR_024214	SNAR-A3	small ILF3/NF90-associated RNA A3	-2.62976	0.000218794
TC19001731.hg.1	NR_024242	SNAR-A14	small ILF3/NF90-associated RNA A14	-2.62976	0.000218794
TC10000967.hg.1	NM_004508	IDI1	isopentenyl-diphosphate delta isomerase 1	-2.61752	0.000169625	CRE	Yes	Yes	Yes	Yes
TC03000892.hg.1	NM_001122752	SERPINI1	serpin peptidase inhibitor, clade I (neuroserpin), member 1	-2.61397	0.000109862	CRE			Yes	Yes
TC06001271.hg.1	NM_017770	ELOVL2	ELOVL fatty acid elongase 2	-2.60501	0.00101711	CRE	Yes		Yes
TC09001001.hg.1	NM_001199987	NDUFB6	NADH dehydrogenase (ubiquinone) 1 beta subcomplex, 6, 17kDa	-2.60177	0.000106627	CRE			Yes	Yes
TC20000588.hg.1	NM_005116	SLC23A2	solute carrier family 23 (ascorbic acid transporter), member 2	-2.59963	0.000119281
TC01001736.hg.1	NM_000574	CD55	CD55 molecule, decay accelerating factor for complement (Cromer blood group)	-2.57947	2.01721e-05	CRE	Yes		Yes
TC01002347.hg.1	NM_002167	ID3	inhibitor of DNA binding 3, dominant negative helix-loop-helix protein	-2.5775	0.00166262	CRE
TC06001298.hg.1	NM_001105566	KIF13A	kinesin family member 13A	-2.55094	2.35524e-05	CRE	Yes	Yes
TC08000132.hg.1	ENST00000520646	LOC101930275	uncharacterized LOC101930275	-2.54949	0.00282203
TC11001999.hg.1	NM_030930	UNC93B1	unc-93 homolog B1 (C. elegans)	-2.5323	7.58372e-05	CRE
TC17001698.hg.1	NM_001243877	TOB1	transducer of ERBB2, 1	-2.52852	4.50881e-05	CRE	Yes	Yes	Yes	Yes
TC6_mann_hap4000209.hg.1	NM_002118	HLA-DMB	major histocompatibility complex, class II, DM beta	-2.50991	9.39346e-05	CRE
TC02001719.hg.1	ENST00000542625	KRT18P52	keratin 18 pseudogene 52	-2.50445	6.92244e-05
TC07003361.hg.1	NM_000786	CYP51A1	cytochrome P450, family 51, subfamily A, polypeptide 1	-2.47741	5.64224e-05	CRE	Yes		Yes
TC01004000.hg.1	ENST00000516247	RNU5E-2P	RNA, U5E small nuclear 2, pseudogene	-2.45387	0.0112626
TC18000272.hg.1	NM_005131	THOC1	THO complex 1	-2.44349	4.21732e-05	CRE	Yes	Yes	Yes	Yes
TC19000686.hg.1	NR_004437	SNAR-A12	small ILF3/NF90-associated RNA A12	-2.43529	0.000181016
TC19000693.hg.1	NR_024216	SNAR-A13	small ILF3/NF90-associated RNA A13	-2.43529	0.000181016
TC07000023.hg.1	NM_002360	MAFK	v-maf avian musculoaponeurotic fibrosarcoma oncogene homolog K	-2.43363	0.000362518	CRE	Yes
TC19000055.hg.1	NM_015675	GADD45B	growth arrest and DNA-damage-inducible, beta	-2.42003	0.00402709	CRE	Yes		Yes	Yes
TC16002038.hg.1	NM_001014449	DDX19B	DEAD (Asp-Glu-Ala-Asp) box polypeptide 19B	-2.40484	3.35613e-05	CRE			Yes	Yes
TC02002676.hg.1	NM_001044385	TMEM237	transmembrane protein 237	-2.40067	3.06869e-05	CRE	Yes	Yes	Yes	Yes
TC15000124.hg.1	NM_000810	GABRA5	gamma-aminobutyric acid (GABA) A receptor, alpha 5	-2.38916	9.35136e-05	CRE			Yes	Yes
TC07001828.hg.1	NM_005302	GPR37	G protein-coupled receptor 37 (endothelin receptor type B-like)	-2.38042	0.00161942	CRE
TC05000096.hg.1	NM_006317	BASP1	brain abundant, membrane attached signal protein 1	-2.35337	0.000485116	CRE			Yes	Yes
TC01003968.hg.1	NM_022051	EGLN1	egl-9 family hypoxia-inducible factor 1	-2.34831	5.35873e-05	CRE
TC18000524.hg.1	NM_001143829	CCDC68	coiled-coil domain containing 68	-2.34758	0.000411456		Yes	Yes	Yes	Yes
TC09001009.hg.1	NM_001172415	BAG1	BCL2-associated athanogene	-2.3423	7.02531e-05		Yes	Yes	Yes
TC19000014.hg.1	NM_173481	MISP	mitotic spindle positioning	-2.33114	0.00177872	CRE			Yes	Yes
TC05001184.hg.1	NM_012334	MYO10	myosin X	-2.33098	0.000133254	CRE
TC08001013.hg.1	NM_001001924	MTUS1	microtubule associated tumor suppressor 1	-2.32195	0.000168402	CRE	Yes	Yes	Yes	Yes
TC03000051.hg.1	NM_001018115	FANCD2	Fanconi anemia, complementation group D2	-2.29969	0.000133411	CRE	Yes	Yes	Yes	Yes
TC12001170.hg.1	NM_006931	SLC2A3	solute carrier family 2 (facilitated glucose transporter), member 3	-2.29679	7.36493e-05
TC06000062.hg.1	NM_001718	BMP6	bone morphogenetic protein 6	-2.28294	0.000109862		Yes	Yes
TC08001022.hg.1	NM_001130518	CSGALNACT1	chondroitin sulfate N-acetylgalactosaminyltransferase 1	-2.27224	3.45157e-05		Yes	Yes	Yes	Yes
TC17001296.hg.1	NM_000638	VTN	vitronectin	-2.26862	0.000263035	CRE	Yes	Yes	Yes	Yes
TC20000082.hg.1	NM_003081	SNAP25	synaptosomal-associated protein, 25kDa	-2.26279	0.000119145	CRE	Yes	Yes	Yes	Yes
TC01003341.hg.1	NM_005920	MEF2D	myocyte enhancer factor 2D	-2.25388	6.36214e-05	CRE	Yes	Yes
TC07000569.hg.1	NM_016116	ASB4	ankyrin repeat and SOCS box containing 4	-2.23783	0.000395574	CRE
TC0X000088.hg.1	NM_001037343	CDKL5	cyclin-dependent kinase-like 5	-2.23584	0.000183897		Yes	Yes	Yes	Yes
TC13000871.hg.1	NM_003749	IRS2	insulin receptor substrate 2	-2.23477	0.000124059
TC15000060.hg.1	NR_003329	SNORD116-14	small nucleolar RNA, C/D box 116-14	-2.231	0.000329827
TC08000127.hg.1	NM_001008539	SLC7A2	solute carrier family 7 (cationic amino acid transporter, y+ system), member 2	-2.21771	0.000261307		Yes	Yes
TC17000495.hg.1	NM_001254	CDC6	cell division cycle 6	-2.19788	0.000110478	CRE	Yes	Yes	Yes	Yes
TC15000824.hg.1	NM_001243137	PDE8A	phosphodiesterase 8A	-2.19238	5.96356e-05	CRE	Yes		Yes
TC01001781.hg.1	NM_014053	FLVCR1	feline leukemia virus subgroup C cellular receptor 1	-2.18291	0.00027863	CRE	Yes		Yes
TC04001219.hg.1	NM_181806	AASDH	aminoadipate-semialdehyde dehydrogenase	-2.17896	0.00081472	CRE	Yes	Yes	Yes	Yes
TC17000583.hg.1	NR_024434	MAP3K14-AS1	MAP3K14 antisense RNA 1	-2.17656	0.00113473		Yes	Yes	Yes	Yes
TC09001325.hg.1	NM_005384	NFIL3	nuclear factor, interleukin 3 regulated	-2.17603	0.000839071	CRE	Yes	Yes	Yes	Yes
TC15000052.hg.1	NR_003317	SNORD116-2	small nucleolar RNA, C/D box 116-2	-2.17395	0.000705609
TC07000692.hg.1	NM_181581	DUS4L	dihydrouridine synthase 4-like (S. cerevisiae)	-2.16944	0.000109862	CRE	Yes	Yes	Yes	Yes
TC19001139.hg.1	NM_024690	MUC16	mucin 16, cell surface associated	-2.16701	0.000150192
TC01002769.hg.1	NM_017768	LRRC40	leucine rich repeat containing 40	-2.16044	7.56347e-05	CRE			Yes	Yes
TC15000304.hg.1	NM_007236	CHP1	calcineurin-like EF-hand protein 1	-2.15408	3.8228e-05	CRE	Yes	Yes	Yes	Yes
TC19000350.hg.1	NM_001025604	ARRDC2	arrestin domain containing 2	-2.14471	0.00036077	CRE	Yes	Yes	Yes	Yes
TC19001278.hg.1	NM_001080421	UNC13A	unc-13 homolog A (C. elegans)	-2.12277	3.56458e-05		Yes	Yes	Yes	Yes
TC02001528.hg.1	BC113076	TMSB4XP2	thymosin beta 4, X-linked pseudogene 2	-2.12118	0.00141327	CRE
TC01004026.hg.1	NM_014322	OPN3	opsin 3	-2.10483	0.000241221	CRE
TC10001320.hg.1	NM_001242359	RHOBTB1	Rho-related BTB domain containing 1	-2.10279	0.000228615	CRE	Yes	Yes	Yes	Yes
TC04000416.hg.1	NM_015393	PARM1	prostate androgen-regulated mucin-like protein 1	-2.10218	0.000205654	CRE
TC08001099.hg.1	NM_001394	DUSP4	dual specificity phosphatase 4	-2.0994	0.000143144	CRE	Yes	Yes
TC6_mcf_hap5000081.hg.1	NR_037177	LOC100294145	uncharacterized LOC100294145	-2.09503	0.00196111
TC09001166.hg.1	ENST00000459575	MIR1299	microRNA 1299	-2.08934	0.000834018
TC04001765.hg.1	NM_005429	VEGFC	vascular endothelial growth factor C	-2.08736	0.000541778	CRE			Yes	Yes
TC15001084.hg.1	NM_000814	GABRB3	gamma-aminobutyric acid (GABA) A receptor, beta 3	-2.07973	0.000217037		Yes	Yes	Yes	Yes
TC06001658.hg.1	NM_001252294	SPDEF	SAM pointed domain containing ETS transcription factor	-2.07627	0.000131473	CRE
TC10000098.hg.1	NM_018518	MCM10	minichromosome maintenance complex component 10	-2.06563	0.000157351	CRE	Yes	Yes	Yes	Yes
TC20000049.hg.1	NR_033917	LINC01433	long intergenic non-protein coding RNA 1433	-2.06478	0.00627529		Yes	Yes	Yes	Yes
TC14000391.hg.1	NM_021979	HSPA2	heat shock 70kDa protein 2	-2.06365	0.00220135		Yes	Yes	Yes
TC03000351.hg.1	NM_000720	CACNA1D	calcium channel, voltage-dependent, L type, alpha 1D subunit	-2.05675	0.000119145	CRE	Yes		Yes
TC14000202.hg.1	NM_001201573	NUBPL	nucleotide binding protein-like	-2.05301	0.000218794	CRE	Yes	Yes
TC0X001155.hg.1	NR_001564	XIST	X inactive specific transcript (non-protein coding)	-2.04454	0.00405425
TC0X002360.hg.1	NR_038988	LINC00630	long intergenic non-protein coding RNA 630	-2.04285	0.00307573		Yes	Yes
TC15000059.hg.1	NR_003328	SNORD116-13	small nucleolar RNA, C/D box 116-13	-2.04213	0.00493001
TC11002035.hg.1	OTTHUMT00000259334	SHANK2	SH3 and multiple ankyrin repeat domains 2	-2.03988	0.0254243
TC15000050.hg.1	NR_003318	SNORD116-3	small nucleolar RNA, C/D box 116-3	-2.039	0.00144027
TC15000055.hg.1	NR_003324	SNORD116-9	small nucleolar RNA, C/D box 116-9	-2.039	0.00144027
TC01001741.hg.1	NM_002389	CD46	CD46 molecule, complement regulatory protein	-2.03811	0.000158516	CRE
TC15000305.hg.1	NR_026757	OIP5-AS1	OIP5 antisense RNA 1	-2.03618	0.000305782		Yes	Yes
TC19000020.hg.1	NM_001928	CFD	complement factor D (adipsin)	-2.0257	0.000667139	CRE	Yes	Yes	Yes	Yes
TC02001627.hg.1	NM_021925	C2orf43	chromosome 2 open reading frame 43	-2.02074	0.000430702	CRE
TC02000612.hg.1	OTTHUMT00000329085	AC092168.2	novel transcript	-2.01918	0.022266
TC06000012.hg.1	NM_001453	FOXC1	forkhead box C1	-2.01263	0.000150192	CRE	Yes		Yes	Yes
TC17000580.hg.1	NM_006460	HEXIM1	hexamethylene bis-acetamide inducible 1	-2.00284	0.000462778	CRE
TC17001465.hg.1	NM_032865	TNS4	tensin 4	-2.00214	0.000872805	CRE	Yes	Yes	Yes	Yes
TC03001629.hg.1	NM_001777	CD47	CD47 molecule	2.00163	0.000489503	CRE	Yes	Yes	Yes	Yes
TC07001080.hg.1	NM_182491	ZFAND2A	zinc finger, AN1-type domain 2A	2.00692	0.000157351	CRE
TC01000745.hg.1	NM_001199741	GADD45A	growth arrest and DNA-damage-inducible, alpha	2.01229	0.000131473
TC02001696.hg.1	NR_028308	BRE-AS1	BRE antisense RNA 1	2.01461	0.0386721
TC05001385.hg.1	NM_001252226	PLK2	polo-like kinase 2	2.02038	0.000157351	CRE	Yes	Yes	Yes	Yes
TC02002707.hg.1	ENST00000428777	KLF7-IT1	KLF7 intronic transcript 1 (non-protein coding)	2.02091	0.00339036
TC05000083.hg.1	NM_007118	TRIO	trio Rho guanine nucleotide exchange factor	2.02224	0.000262395	CRE	Yes	Yes
TC06000721.hg.1	OTTHUMT00000041156	RP3-331H24.4	putative novel transcript	2.02261	0.00920301
TC12000611.hg.1	NM_000239	LYZ	lysozyme	2.02501	0.00221352
TC06004141.hg.1	NM_000636	SOD2	superoxide dismutase 2, mitochondrial	2.02514	0.00149424	CRE	Yes	Yes	Yes	Yes
TC07001293.hg.1	NM_003014	SFRP4	secreted frizzled-related protein 4	2.02746	0.000235961	CRE
TC12001178.hg.1	NM_014358	CLEC4E	C-type lectin domain family 4, member E	2.03189	0.00231274	CRE
TC02002419.hg.1	NM_001254738	RND3	Rho family GTPase 3	2.03549	0.000143855	CRE	Yes	Yes	Yes	Yes
TC05001861.hg.1	NM_000591	CD14	CD14 molecule	2.03861	0.000761223
TC03001887.hg.1	NM_001184723	TM4SF18	transmembrane 4 L six family member 18	2.03962	0.000303179	CRE
TC03001651.hg.1	NM_199511	CCDC80	coiled-coil domain containing 80	2.04403	0.000212447
TC15000089.hg.1	NR_003309	SNORD115-17	small nucleolar RNA, C/D box 115-17	2.04688	0.0460187
TC15000090.hg.1	NR_003310	SNORD115-18	small nucleolar RNA, C/D box 115-18	2.04688	0.0460187
TC15000091.hg.1	NR_003311	SNORD115-19	small nucleolar RNA, C/D box 115-19	2.04688	0.0460187
TC04001283.hg.1	NM_002994	CXCL5	chemokine (C-X-C motif) ligand 5	2.05513	0.000402924	CRE	Yes	Yes	Yes	Yes
TC02000275.hg.1	NM_000341	SLC3A1	solute carrier family 3 (amino acid transporter heavy chain), member 1	2.05683	0.000113762
TC15000622.hg.1	NM_001145102	SMAD3	SMAD family member 3	2.05839	0.000143285	CRE	Yes	Yes	Yes	Yes
TC03001869.hg.1	NM_021105	PLSCR1	phospholipid scramblase 1	2.05911	0.000100117
TC01003007.hg.1	NM_001010922	BCL2L15	BCL2-like 15	2.06061	0.000829071
TC21000200.hg.1	AL355711	ABCG1	ATP-binding cassette, sub-family G (WHITE), member 1	2.07609	0.00136179		Yes	Yes
TC02002481.hg.1	NM_022168	IFIH1	interferon induced with helicase C domain 1	2.07795	0.000199226	CRE	Yes		Yes
TC07000625.hg.1	NM_006076	AGFG2	ArfGAP with FG repeats 2	2.08527	9.34832e-05	CRE	Yes	Yes	Yes	Yes
TC02002827.hg.1	NM_014689	DOCK10	dedicator of cytokinesis 10	2.09099	0.000183897	CRE
TC12001783.hg.1	NM_001146335	SLC6A15	solute carrier family 6 (neutral amino acid transporter), member 15	2.09155	0.000248753	CRE			Yes	Yes
TC05000243.hg.1	NM_005921	MAP3K1	mitogen-activated protein kinase kinase kinase 1, E3 ubiquitin protein ligase	2.1061	0.000218794		Yes		Yes
TC03001955.hg.1	ENST00000458819	RNU7-136P	RNA, U7 small nuclear 136 pseudogene	2.1102	0.0268382
TC11000252.hg.1	NM_001111018	NAV2	neuron navigator 2	2.11236	0.000190669	CRE	Yes		Yes	Yes
TC02001140.hg.1	ENST00000433933	LOC101927482	uncharacterized LOC101927482	2.11426	0.00129737
TC16000879.hg.1	NM_001099455	CPPED1	calcineurin-like phosphoesterase domain containing 1	2.13544	0.000363214	CRE
TC01002903.hg.1	NM_000110	DPYD	dihydropyrimidine dehydrogenase	2.13612	9.42743e-05				Yes	Yes
TC15001719.hg.1	NM_001114735	BCL2A1	BCL2-related protein A1	2.13752	0.0110898
TC11001107.hg.1	NM_003105	SORL1	sortilin-related receptor, L(DLR class) A repeats containing	2.14333	0.000143855	CRE	Yes	Yes
TC06001128.hg.1	NM_001178088	SYNJ2	synaptojanin 2	2.14483	6.67847e-05	CRE	Yes	Yes	Yes	Yes
TC17001924.hg.1	NM_005567	LGALS3BP	lectin, galactoside-binding, soluble, 3 binding protein	2.14986	0.00172415				Yes	Yes
TC03000498.hg.1	ENST00000473756	LINC00973	long intergenic non-protein coding RNA 973	2.16527	0.00218646
TC06001035.hg.1	NM_016217	HECA	headcase homolog (Drosophila)	2.16914	0.000764417	CRE
TC04000912.hg.1	NM_003265	TLR3	toll-like receptor 3	2.17729	0.000109862
TC01003267.hg.1	NM_002960	S100A3	S100 calcium binding protein A3	2.1774	0.000146343	CRE	Yes	Yes
TC02002823.hg.1	NM_001136528	SERPINE2	serpin peptidase inhibitor, clade E (nexin, plasminogen activator inhibitor type 1), member 2	2.17783	8.67846e-05	CRE	Yes		Yes
TC16000921.hg.1	NM_016235	GPRC5B	G protein-coupled receptor, class C, group 5, member B	2.18057	0.000291083	CRE	Yes	Yes	Yes	Yes
TC14001238.hg.1	NM_016445	PLEK2	pleckstrin 2	2.18071	0.000533211	CRE	Yes	Yes
TC08001253.hg.1	NM_004056	CA8	carbonic anhydrase VIII	2.19655	0.000143285
TC01003847.hg.1	NM_007207	DUSP10	dual specificity phosphatase 10	2.21321	0.000146357	CRE	Yes	Yes	Yes	Yes
TC06002242.hg.1	NM_012419	RGS17	regulator of G-protein signaling 17	2.21492	0.000773538	CRE	Yes	Yes	Yes	Yes
TC16000214.hg.1	NM_001105248	TMC5	transmembrane channel-like 5	2.22005	0.000207215		Yes	Yes	Yes	Yes
TC12001705.hg.1	NM_001005502	CPM	carboxypeptidase M	2.22492	0.000430093	CRE	Yes	Yes	Yes	Yes
TC15000752.hg.1	NM_018689	CEMIP	cell migration inducing protein, hyaluronan binding	2.23274	0.0050449		Yes	Yes	Yes	Yes
TC20000913.hg.1	NM_001161841	SULF2	sulfatase 2	2.24759	0.000169625	CRE	Yes	Yes	Yes	Yes
TC10000420.hg.1	NM_012339	TSPAN15	tetraspanin 15	2.2483	4.89117e-05
TC02002891.hg.1	NM_005737	ARL4C	ADP-ribosylation factor-like 4C	2.27404	0.000157351	CRE	Yes	Yes	Yes	Yes
TC09001276.hg.1	NM_152573	RASEF	RAS and EF-hand domain containing	2.27414	4.23406e-05	CRE
TC01003784.hg.1	NM_000228	LAMB3	laminin, beta 3	2.30773	0.000124059	CRE	Yes	Yes
TC01002654.hg.1	NM_002867	RAB3B	RAB3B, member RAS oncogene family	2.30846	9.18729e-05	CRE
TC01000288.hg.1	NM_004442	EPHB2	EPH receptor B2	2.30945	0.00018198		Yes	Yes	Yes	Yes
TC01000814.hg.1	NM_145172	WDR63	WD repeat domain 63	2.33345	0.000608334	CRE	Yes	Yes
TC0X000085.hg.1	NR_039925	MIR4768	microRNA 4768	2.33843	0.00190082
TC04001830.hg.1	NM_173553	TRIML2	tripartite motif family-like 2	2.3481	0.00137073	CRE
TC02001127.hg.1	ENST00000516321	RNU6-1045P	RNA, U6 small nuclear 1045, pseudogene	2.35903	0.0391042
TC02002627.hg.1	NM_004657	SDPR	serum deprivation response	2.35942	0.019058	CRE
TC14001253.hg.1	NM_001244698	ZFP36L1	ZFP36 ring finger protein-like 1	2.37564	7.90364e-05	CRE	Yes		Yes
TC07001611.hg.1	NM_006528	TFPI2	tissue factor pathway inhibitor 2	2.38896	8.67846e-05	CRE
TC09000560.hg.1	NM_003358	UGCG	UDP-glucose ceramide glucosyltransferase	2.41627	2.86985e-05
TC01001930.hg.1	NM_173508	SLC35F3	solute carrier family 35, member F3	2.4325	0.000211357	CRE			Yes	Yes
TC14001474.hg.1	NM_024734	CLMN	calmin (calponin-like, transmembrane)	2.49672	0.000130731	CRE	Yes	Yes	Yes	Yes
TC03000831.hg.1	NM_033050	SUCNR1	succinate receptor 1	2.54757	0.000293854	CRE
TC01006361.hg.1	NM_004120	GBP2	guanylate binding protein 2, interferon-inducible	2.55717	1.89412e-05	CRE
TC19000584.hg.1	NM_002483	CEACAM6	carcinoembryonic antigen-related cell adhesion molecule 6 (non-specific cross reacting antigen)	2.56424	0.000415694
TC17001378.hg.1	NM_002985	CCL5	chemokine (C-C motif) ligand 5	2.56625	0.000407019	CRE
TC02000762.hg.1	NM_002193	INHBB	inhibin, beta B	2.56961	0.00049765	CRE	Yes		Yes
TC04000408.hg.1	NM_000584	CXCL8	chemokine (C-X-C motif) ligand 8	2.5707	0.000252519	CRE
TC09001618.hg.1	NM_001035254	FAM102A	family with sequence similarity 102, member A	2.57751	6.92244e-05		Yes	Yes	Yes	Yes
TC01002163.hg.1	NM_001561	TNFRSF9	tumor necrosis factor receptor superfamily, member 9	2.59116	0.000213156	CRE
TC06002152.hg.1	NM_000416	IFNGR1	interferon gamma receptor 1	2.59234	8.64401e-06	CRE
TC19001747.hg.1	NM_138411	FAM71E1	family with sequence similarity 71, member E1	2.60541	0.000421349
TC03002096.hg.1	NM_001130845	BCL6	B-cell CLL/lymphoma 6	2.62316	8.67846e-05	CRE
TC17000861.hg.1	NM_000213	ITGB4	integrin, beta 4	2.62922	2.01721e-05	CRE	Yes		Yes	Yes
TC17001250.hg.1	NM_000691	ALDH3A1	aldehyde dehydrogenase 3 family, member A1	2.63049	0.000286178	CRE	Yes	Yes	Yes	Yes
TC08001440.hg.1	NM_001135733	TP53INP1	tumor protein p53 inducible nuclear protein 1	2.63729	1.7417e-05	CRE	Yes	Yes	Yes	Yes
TC15001641.hg.1	NM_001142617	STRA6	stimulated by retinoic acid 6	2.64298	0.000124059		Yes	Yes	Yes	Yes
TC01002287.hg.1	NM_007365	PADI2	peptidyl arginine deiminase, type II	2.64785	6.44504e-05	CRE	Yes	Yes	Yes	Yes
TC01000955.hg.1	NM_000757	CSF1	colony stimulating factor 1 (macrophage)	2.65219	0.000157351
TC0X000879.hg.1	NM_020665	TMEM27	transmembrane protein 27	2.71504	0.00067134	CRE
TC21000480.hg.1	NM_001098402	ZBTB21	zinc finger and BTB domain containing 21	2.71594	2.33053e-05				Yes
TC19000174.hg.1	NM_000201	ICAM1	intercellular adhesion molecule 1	2.74258	0.000367841	CRE	Yes		Yes
TC02002746.hg.1	NM_015657	ABCA12	ATP-binding cassette, sub-family A (ABC1), member 12	2.76414	7.28718e-05	CRE
TC05002043.hg.1	NM_003062	SLIT3	slit homolog 3 (Drosophila)	2.8163	1.42523e-05	CRE
TC01000723.hg.1	NM_001083592	ROR1	receptor tyrosine kinase-like orphan receptor 1	2.81732	0.000181681	CRE
TC04000411.hg.1	NM_001511	CXCL1	chemokine (C-X-C motif) ligand 1 (melanoma growth stimulating activity, alpha)	2.98282	0.000580112	CRE			Yes	Yes
TC11000956.hg.1	NM_001165	BIRC3	baculoviral IAP repeat containing 3	3.01179	9.39346e-05	CRE
TC14002309.hg.1	NM_001085	SERPINA3	serpin peptidase inhibitor, clade A (alpha-1 antiproteinase, antitrypsin), member 3	3.11392	3.11484e-05	CRE
TC03000056.hg.1	NM_001570	IRAK2	interleukin-1 receptor-associated kinase 2	3.14678	1.52383e-05	CRE
TC01000309.hg.1	NM_001195010	GRHL3	grainyhead-like 3 (Drosophila)	3.17608	5.84672e-05		Yes		Yes
TC14000794.hg.1	NM_006291	TNFAIP2	tumor necrosis factor, alpha-induced protein 2	3.29693	3.45157e-05	CRE
TC06001027.hg.1	NM_006290	TNFAIP3	tumor necrosis factor, alpha-induced protein 3	3.30409	1.59804e-05	CRE	Yes	Yes	Yes	Yes
TC07000643.hg.1	NM_000602	SERPINE1	serpin peptidase inhibitor, clade E (nexin, plasminogen activator inhibitor type 1), member 1	3.41494	4.21732e-05	CRE	Yes	Yes	Yes	Yes
TC12000656.hg.1	NM_014903	NAV3	neuron navigator 3	3.5238	3.94039e-06	CRE
TC05002146.hg.1	NM_005110	GFPT2	glutamine-fructose-6-phosphate transaminase 2	3.53576	3.94039e-06		Yes	Yes	Yes	Yes
TC19001101.hg.1	NM_001252	CD70	CD70 molecule	3.97243	0.000183897				Yes	Yes
TC20000718.hg.1	NM_001898	CST1	cystatin SN	4.14195	7.49258e-05
TC12000189.hg.1	NM_001423	EMP1	epithelial membrane protein 1	4.38152	2.13679e-05	CRE
TC10000475.hg.1	NM_001145031	PLAU	plasminogen activator, urokinase	4.48107	5.23969e-06	CRE
TC20000717.hg.1	NM_001899	CST4	cystatin S	4.56938	7.36479e-05
TC15000971.hg.1	NM_000693	ALDH1A3	aldehyde dehydrogenase 1 family, member A3	4.95298	1.87639e-05	CRE	Yes	Yes	Yes	Yes
TC19001644.hg.1	BC062328	IGFL2-AS1	IGFL2 antisense RNA 1	4.97999	8.67846e-05
TC01000231.hg.1	NM_016233	PADI3	peptidyl arginine deiminase, type III	5.73658	2.43389e-06	CRE
TC10001517.hg.1	NM_014391	ANKRD1	ankyrin repeat domain 1 (cardiac muscle)	6.03283	1.52383e-05
TC07003299.hg.1	NM_000777	CYP3A5	cytochrome P450, family 3, subfamily A, polypeptide 5	6.51638	6.94124e-07
TC17000383.hg.1	NM_002982	CCL2	chemokine (C-C motif) ligand 2	12.5831	1.0278e-05
TC11002228.hg.1	NM_002423	MMP7	matrix metallopeptidase 7 (matrilysin, uterine)	25.4628	6.94124e-07	CRE	Yes	Yes	Yes	Yes

## Sheet: Suppl. File 1b
Supplementary File 1b: GSEA analysis revealed that multiple oncogenic signatures were negatively associated with the dnCRTC-regulated target genes.
Gene Sets (MSigDB)	SIZE	ES	NES	NOM p-val	FDR q-val
RPS14_DN.V1_DN	177	-0.539361	-2.06362	0	0.000734043
GCNP_SHH_UP_LATE.V1_UP	167	-0.529474	-2.01643	0	0.00135026
GCNP_SHH_UP_EARLY.V1_UP	158	-0.511553	-1.9439	0	0.00393472
CSR_LATE_UP.V1_UP	159	-0.504998	-1.93644	0	0.00344575
RB_P107_DN.V1_UP	133	-0.530589	-1.93631	0	0.0027566
E2F1_UP.V1_UP	173	-0.493655	-1.91673	0	0.00354717
ALK_DN.V1_UP	137	-0.489414	-1.80176	0	0.00937936
NFE2L2.V2	415	-0.419862	-1.77791	0	0.00982584
VEGF_A_UP.V1_DN	185	-0.439161	-1.6966	0.00179856	0.0180758
PRC2_EZH2_UP.V1_DN	180	-0.440482	-1.67797	0.00178571	0.0191414
HOXA9_DN.V1_DN	177	-0.43903	-1.67607	0	0.0175307
PDGF_UP.V1_UP	141	-0.441816	-1.66095	0	0.0183203
PRC2_EED_UP.V1_DN	178	-0.419283	-1.62299	0.00190114	0.0245885
PIGF_UP.V1_UP	179	-0.415161	-1.60442	0	0.0269828
KRAS.PROSTATE_UP.V1_UP	126	-0.429024	-1.58871	0.0037037	0.028736
MEL18_DN.V1_DN	137	-0.412378	-1.53679	0.00547445	0.0421379
RB_DN.V1_UP	126	-0.413808	-1.5168	0.0174419	0.0485869
									S

## Sheet: Suppl. File 1c
Supplementary File 1c: Primer and sgRNA sequences used in this study. Sequences were presented in the 5' to 3' direction.
RT-PCR primers:
Gene	Forward Primer	Reverse Primer	Amplication (bp)
CRTC1	TGTCTCTCTGACCCCCTTCCAATCC	GTCCGCGGGTGGTGAGAGGTA	196
CRTC2	AGCCCCCTGAGTTTGCTCGC	TGGGGGTAACCGCTGGTCAGT	159
CRTC3	TGACCAGCAGTCCATGAGGCCA	GGTCTTTGAACAGGCTGGTGCTGG	176
LINC00473	AAACGCGAACGTGAGCCCCG	CGCCATGCTCTGGCGCAGTT	134
FOS	CACTCCAAGCGGAGACAG	AGGTCATCAGGGATCTTGCAG	139
NR4A2	GCCGGAGAGGTCGTTTGCCC	AGGGTTCGCCTGGAACCTGGAA	155
INSL4	GATGTGGTCCCCGATTTGGA	AGGTTGACACCATTTCTTTGGG	123
CPS1	CTGATGCTGCCCACACAAAC	AGGGGAAGGATCGAGAAGCT	175
PDK4	ACAGACAGGAAACCCAAGCC	GTTCAACTGTTGCCCGCATT	248
NR4A1	GAGTCCCAGTGGCGGAGGCT	CAGGCTGCACCCTACCCGGC	143
TM4SF20	TCCAGGCTCTCTTAAAAGGTCC	ATGGTGTCGTTACTGGTGGG	181
NR4A3	GAAGAGGGCAGCCCGGCAAG	ACGCAGGGCATATCTGGAGGGT	176
PTGS2	GTTCCCACCCATGTCAAAAC	CCGGTGTTGAGCAGTTTTCT	108
SIK1	AGCTTCTGAACCATCCACACA	TTTGCCAGAACTTCTTCCGC	162
PDE4B	CCGATCGCATTCAGGTCCTTCGC	TGCGGTCTGTCCATTGCCGA	96
PDE4D	AACACATGAATCTACTGGCTGA	TCACACATGGGGCTTATCTCC	253
ID1	TTCTCCAGCACGTCATCGAC	CTTCAGCGACACAAGATGCG	190
GADPH	CAATGACCCCTTCATTGACC	GACAAGCTTCCCGTTCTCAG	106
CHIP-PCR primers:
Promotor	Forward Primer	Reverse Primer	Amplication (bp)
LINC00473 promotor	CTACAGACGTCATCGCCTCC	CACATTTGGGGGTGCTTGTG	129
NR4A2 promoter	GGGGAAAGTGAAGTGTCG	CCGCGCTCGCTTTGGTAT	198
sgRNA target squences:
sgCRTC1-A	TGGCGACTTCGAACAATCCG
sgCRTC1-B	TTACCCGCGCGGCCCGCGTC
sgCRTC1-C	CCCAGCCGAGGCCAGTACTA
sgCRTC2-A	GCAGCGAGATCCTCGAAGAA
sgCRTC2-B	AGGATATGTGGCGGGTGTAT
sgCRTC2-C	ACAGGCCCAAAAACTGCGAC
sgCRTC3-A	CTGACGCACTGCTCCGCAGC
sgCRTC3-B	AAAAAGGATATTTGTCGCCC
sgCRTC3-C	AACCCGCCATCACGGGCTGG
sg-Ctr	CTTCCGCGGCCCGTTCAA
gLKB1-1	GGCACTGCACCCGTTCGCGG
gLKB1-2	GTTGCGAAGGATCCCCAACG
gNT	TCGGCATACGGGACACACGC
